# Supplementary material
Source: MDPI journal article supplement (https://www.mdpi.com/2073-4441/14/18/2811)
Supplement: s1 [file s1]

**Supplementary materials for:**

**Insights into the kinetics, theoretical model and mechanism of free radical synergistic degradation of micropollutants in UV/peroxydisulfate process**

Zhixiong Liu<sup>1</sup>, Wenlei Qin<sup>2</sup>, Lei Sun<sup>1</sup>, Huiyu Dong<sup>2</sup>,

Xiangjuan Yuan<sup>1,3\*</sup>, Fei Pan<sup>1</sup>, Dongsheng Xia<sup>1,3\*</sup>

<sup>1</sup> *School of Environmental Engineering, Wuhan Textile University, Wuhan 430073, China.*

<sup>2</sup> *Research Center for Eco-Environmental Sciences, University of Chinese Academy of Sciences, 18 Shuang-qing Road, Beijing 100085, China*

<sup>3</sup> *Engineering Research Center for Clean Production of Textile Dyeing and Printing, Ministry of Education, Wuhan 430073, China*

\* Corresponding authors:

yuanxiangjuan1986@outlook.com (X.Y.);

dongsheng\_xia@wtu.edu.cn (D.X.).

Number of pages (including this page): 47

Number of Texts: 4

Number of Tables: 6

Number of Figures: 15

## List of contents

**Text S1.** Determination of  $F_{p,o,UV}$  in the MVPS.

**Text S2.** UPLC-QTOF-MS method.

**Text S3.** Determination of the second-order reaction rate constants.

**Text S4.** Calculation of condensed Fukui function.

**Figure S1** Schematic diagram of the MVPS.

**Figure S2** The degradation of uridine under direct UV photolysis. Conditions: [Uridine]<sub>0</sub> = 0.01 mM, pH=6.0, T = 20°C.

**Figure S3** Determination of the second-order rate constant for the reaction of ACY with  $\cdot\text{OH}$  at pH=6.0 (a), pH=9.0 (b), and pH=11.0 (c). Conditions: [ACY]<sub>0</sub> = 0.022 mM, [pCBA]<sub>0</sub> = 0.022 mM, [H<sub>2</sub>O<sub>2</sub>]<sub>0</sub> = 0.6 mM,  $E_{p,o,UV} = 1.12 \times 10^{-3}$  einstein m<sup>-2</sup> s<sup>-1</sup>, T = 20°C.

**Figure S4** Determination of the second-order rate constant for the reaction of ACY with  $\text{SO}_4^{\cdot-}$  at pH=6.0 (a), pH=9.0 (b), and pH=11.0 (c). Conditions: [ACY]<sub>0</sub> = 0.022 mM, [BA]<sub>0</sub> = 0.022 mM, [PDS]<sub>0</sub> = 0.6 mM,  $E_{p,o,UV} = 1.12 \times 10^{-3}$  einstein m<sup>-2</sup> s<sup>-1</sup>, T = 20°C.

**Figure S5** Determination of the second-order rate constant for the reaction of ATL with  $\cdot\text{OH}$  at pH=6.0 (a), pH=9.0 (b), and pH=11.0 (c). Conditions: [ATL]<sub>0</sub> = 0.019 mM, [pCBA]<sub>0</sub> = 0.019 mM, [H<sub>2</sub>O<sub>2</sub>]<sub>0</sub> = 0.6 mM,  $E_{p,o,UV} = 1.12 \times 10^{-3}$  einstein m<sup>-2</sup> s<sup>-1</sup>, T = 20°C.

**Figure S6** Determination of the second-order rate constant for the reaction of ATL with  $\text{SO}_4^{\cdot-}$  pH=6.0 (a), pH=9.0 (b), and pH=11.0 (c). Conditions: [ATL]<sub>0</sub> = 0.019 mM, [pCBA]<sub>0</sub> = 0.019 mM, [H<sub>2</sub>O<sub>2</sub>]<sub>0</sub> = 0.6 mM,  $E_{p,o,UV} = 1.12 \times 10^{-3}$  einstein m<sup>-2</sup> s<sup>-1</sup>, T = 20°C.

**Figure S7** The existence forms of competing substrates pCBA(a) and BA(b) at different pH. Conditions: [ATL]<sub>0</sub> = 0.019 mM, [PDS]<sub>0</sub> = 0.6 mM,  $E_{p,o,UV} = 1.12 \times 10^{-3}$  einstein m<sup>-2</sup> s<sup>-1</sup>, T = 20°C.

**Figure S8** Determination of ACY by UV irradiation (a) and PDS oxidation (b) at

different pH. Conditions:  $[ACY]_0 = 0.022$  mM,  $[PDS]_0 = 0.6$  mM,  $E_{p,o,UV} = 1.12 \times 10^{-3}$  einstein  $m^{-2} s^{-1}$ ,  $T = 20^\circ C$ .

**Figure S9** Determination of ATL by UV irradiation (a) and PDS oxidation (b) at different pH. Conditions:  $[ATL]_0 = 0.019$  mM,  $[PDS]_0 = 0.6$  mM,  $E_{p,o,UV} = 1.12 \times 10^{-3}$  einstein  $m^{-2} s^{-1}$ ,  $T = 20^\circ C$ .

**Figure S10** The apparent degradation rate constants of NB in direct UV photolysis and UV/PDS processes at different pHs. Conditions:  $[NB]_0 = 0.02$  mM,  $[PDS]_0 = 0.6$  mM,  $E_{p,o,UV} = 1.12 \times 10^{-3}$  einstein  $m^{-2} s^{-1}$ ,  $T = 20^\circ C$ .

**Figure S11** EPR spectra of  $\cdot OH$  and  $SO_4^{\cdot -}$  adducts in UV/PDS process. Conditions:  $[PDS]_0 = 0.6$  mM,  $E_{p,o,UV} = 1.12 \times 10^{-3}$  einstein  $m^{-2} s^{-1}$ ,  $pH = 6.0$ ,  $T = 20^\circ C$ .

**Figure S12** Attenuation of PDS in UV/PDS process for the degradation of ACY (a) and ATL (b). Conditions:  $[ACY]_0 = 0.022$  mM,  $[ATL]_0 = 0.019$  mM,  $[PDS]_0 = 0.6$  mM,  $E_{p,o,UV} = 1.12 \times 10^{-3}$  einstein  $m^{-2} s^{-1}$ ,  $pH = 6.0$ ,  $T = 20^\circ C$ .

**Figure S13** Effect of  $SO_4^{2-}$  dosage on the  $k_{obs}$  of ACY (a) and ATL (b) degradation and specific rates of  $\cdot OH$  and  $SO_4^{\cdot -}$  in the UV/PDS process. Conditions:  $[ACY]_0 = 0.022$  mM,  $[ATL]_0 = 0.019$  mM,  $[PDS]_0 = 0.6$  mM,  $E_{p,o,UV} = 1.12 \times 10^{-3}$  einstein  $m^{-2} s^{-1}$ ,  $pH = 6.0$ ,  $T = 20^\circ C$ .

**Figure S14** Effect of  $NO_3^-$  dosage on the  $k_{obs}$  of ACY (a) and ATL (b) degradation and specific rates of  $\cdot OH$  and  $SO_4^{\cdot -}$  in UV/PDS process. Conditions:  $[ACY]_0 = 0.022$  mM,  $[ATL]_0 = 0.019$  mM,  $[PDS]_0 = 0.6$  mM,  $E_{p,o,UV} = 1.12 \times 10^{-3}$  einstein  $m^{-2} s^{-1}$ ,  $pH = 6.0$ ,  $T = 20^\circ C$ .

**Figure S15** Structural formula of ACY(a) and ATL(b).

**Table S1.** Principal reactions and rate constants in the UV/PDS system.

**Table S2.** Modeled steady-state concentrations of  $\cdot OH$  and  $SO_4^{\cdot -}$  in different water matrices.

**Table S3.** Calculated condensed Fukui function and dual descriptor of ACY.<sup>a</sup>

**Table S4.** Calculated condensed Fukui function and dual descriptor of ATL.<sup>a</sup>

**Table S5.** Major intermediates of ACY detected in UV/PDS process.

**Table S6.** Major intermediates of ATL detected in UV/PDS process.

**Text S1.** Determination of  $F_{p,o,UV}$  in the MVPS.

In a certain exposure time, only a part of water sample could receive the UV irradiation, while the remaining part was in the dark. Hence, by defining a reduction equivalent exposure time ( $t_{\text{ree}}$ , s) as the total reaction time ( $t$ , s) multiplied by the ratio of the exposure volume of the operation tube ( $\pi r^2 L$ , m<sup>3</sup>) to the total sample volume ( $V$ , m<sup>3</sup>), the UV ( $F_{p,o,UV}$ , einstein m<sup>-2</sup>) photon fluence can be readily calculated as follows [1]:

$$t_{\text{ree}} = \frac{\pi r^2 h}{V} t \quad (\text{S1})$$

$$F_{p,o,UV} = E_{p,o,UV} t_{\text{ree}} \quad (\text{S2})$$

Where  $t$  is the reaction time (s),  $V$  is the volume of reaction solution (m<sup>3</sup>),  $r$  and  $h$  are the radius and length of the UV tube (m), respectively.  $E_{p,o,UV}$  was the UV photon fluence rate (PFR) in UV (einstein m<sup>-2</sup> s<sup>-1</sup>), respectively. Hence, the total exposure photon fluence ( $F_{p,o}$ , einstein m<sup>-2</sup>) in the UV tube is equal to the sum of  $F_{p,o,UV}$ .

Uridine (0.01 mM) was used as the chemical actinometer to determine the  $F_{p,o,UV}$  in the MVPS, respectively. The  $F_{p,o,UV}$  (einstein m<sup>-2</sup>) could be calculated as follows:

$$F_{p,o,UV} = \frac{k_u}{\ln(10) \times 0.1 \times \varepsilon_\lambda \times \Phi_u} \times t \quad (\text{S3})$$

Where  $k_u$  ( $s^{-1}$ ) is the time-based pseudo-first-order rate constant for UV photolysis of uridine, the  $\epsilon_\lambda$  ( $M^{-1} \text{ cm}^{-1}$ ) and  $\Phi_u$  are the molar absorption coefficient and quantum yield of uridine at an exposure wavelength ( $\lambda$ ), respectively. The  $\epsilon_{254}$  and  $\Phi_u$  values were reported to be  $8775 \text{ M}^{-1} \text{ cm}^{-1}$  and 0.020, respectively [2].

**Text S2. UPLC-Q-TOF-MS method**

The ACY and ATL degradation intermediates in UV/PDS process were identified on an Agilent 1290 UPLC system equipped with Waters Acquity UPLC BEH C18 column (2.1×100 mm, 1.7 μm). The column was maintained at 30°C and the injection volume was 2 μL. Milli-Q water containing 0.1% formic acid (v/v) (A) and acetonitrile (B) were used as the mobile phases at a flow rate of 0.2 mL/min. The gradient elution program (time in min, % mobile phase B) was set as follows: (0, 10), (2, 10), (5, 60), (8, 60), (12, 90), (15, 90), (16, 10), and (19, 10).

An Agilent 6545B MS Q-TOF, equipped with an electrospray ionization (ESI) source and operated in the positive ion mode, was employed to analyze degradation intermediates. The high-resolution mass spectra were collected from m/z 50 to 1500. The MS system was operated under the following conditions: capillary voltage 3.5 kV, drying gas temperature 320°C, drying gas flow rate 8 L/min, sheath gas temperature 350°C, sheath gas flow 11 L/min, nebulizing gas pressure 35 psi, and nozzle voltage 1.0 kV. The reference masses were 121.05087300 and 922.00979800 under ESI+ mode. The MassHunter Workstation Software (B.04.00, Agilent) was employed for both instrument control and data acquisition/analysis.

**Text S3. Determination of the second-order reaction rate constants.**

The parachlorobenzoic acid (pCBA) and benzoic acid (BA) were employed as the reference compounds in UV/H<sub>2</sub>O<sub>2</sub> and UV/PDS processes due to their known reaction rate constants reacting with two radicals ( $k_{\bullet_{OH},pCBA}=5\times10^9\text{ M}^{-1}\text{ s}^{-1}$  and  $k_{\bullet_{SO_4^-},BA}=1.2\times10^9\text{ M}^{-1}\text{ s}^{-1}$ ) [3].

Because the reactions between ACY, ATL or pCBA and H<sub>2</sub>O<sub>2</sub> are negligible, the function of ACY, ATL, and pCBA removal in UV/H<sub>2</sub>O<sub>2</sub> process can be expressed as Eqs. (S4-S6):

$$-\frac{d[ACY]}{dt} = k_{UV,ACY}[ACY] + k_{\bullet OH,ACY}[ACY] \quad (S4)$$

$$-\frac{d[ATL]}{dt} = k_{UV,ATL}[ATL] + k_{\bullet OH,ATL}[ATL] \quad (S5)$$

$$-\frac{d[pCBA]}{dt} = k_{UV,pCBA}[pCBA] + k_{\bullet OH,pCBA}[pCBA] \quad (S6)$$

Where  $k_{UV,ACY}$ ,  $k_{UV,ATL}$ , and  $k_{UV,pCBA}$  represent the direct UV photolysis rate constants (s<sup>-1</sup>) of ACY, ATL, and pCBA, respectively.  $k_{\bullet OH,ACY}$  and  $k_{\bullet OH,ATL}$  can be calculated by Eqs. (S7) and (S8):

$$\frac{k_{\bullet OH,ACY}[ACY]}{k_{\bullet OH,pCBA}[pCBA]} = -\frac{\frac{d[ACY]}{dt} + k_{UV,ACY}[ACY]}{\frac{d[pCBA]}{dt} + k_{UV,pCBA}[pCBA]} \quad (S7)$$

$$\frac{k_{\bullet OH,ATL}[ATL]}{k_{\bullet OH,pCBA}[pCBA]} = -\frac{\frac{d[ATL]}{dt} + k_{UV,ATL}[ATL]}{\frac{d[pCBA]}{dt} + k_{UV,pCBA}[pCBA]} \quad (S8)$$

Similarly, the reaction between ACY, ATL, or BA and PDS are negligible as well. Hence, the function of ACY, ATL, and BA removal in UV/PDS process can be expressed as Eqs. (S9-S11).

$$-\frac{d[ACY]}{dt} = k_{UV,ACY}[ACY] + k_{SO_4^{\bullet-},ACY}[ACY] \quad (S9)$$

$$-\frac{d[ATL]}{dt} = k_{UV,ATL}[ATL] + k_{SO_4^{\bullet-},ATL}[ATL] \quad (S10)$$

$$-\frac{d[BA]}{dt} = k_{UV,BA}[BA] + k_{SO_4^{\bullet-},BA}[BA] \quad (S11)$$

where  $k_{UV,BA}$  represents the direct UV photolysis rate constant ( $s^{-1}$ ) of BA.

Therefore, the  $k_{SO_4^{\bullet-},ACY}$  and  $k_{SO_4^{\bullet-},ATL}$  could be calculated by Eqs. (S12) and (S13).

$$\frac{k_{SO_4^{\bullet-},ACY}[ACY]}{k_{SO_4^{\bullet-},BA}[BA]} = - \frac{\frac{d[ACY]}{dt} + k_{UV,ACY}[ACY]}{\frac{d[BA]}{dt} + k_{UV,BA}[BA]} \quad (S12)$$

$$\frac{k_{SO_4^{\bullet-},ACY}[ATL]}{k_{SO_4^{\bullet-},BA}[BA]} = - \frac{\frac{d[ATL]}{dt} + k_{UV,ACY}[ATL]}{\frac{d[BA]}{dt} + k_{UV,BA}[BA]} \quad (S13)$$



**Text S4.** Calculation of condensed Fukui function.

Fukui function is an important conception in conceptual density functional theory, which has been widely used to predict the regioselectivity of electrophilic, nucleophilic, and radical attacks. Fukui function is defined as Eq (S14) [3].

$$f(r) = \left[ \frac{\partial \mu}{\partial v(r)} \right]_N = \left[ \frac{\partial \rho(r)}{\partial N} \right]_{v(r)} \quad (\text{S14})$$

where  $\rho(r)$  is the electron density at a point  $r$  in space,  $N$  is electron number in present system, the constant term  $v$  in the partial derivative is external potential. In the condensed version of Fukui function, atomic population number is used to represent the amount of electron density distribution around an atom. The condensed Fukui function ( $f$ ) can be calculated as follows:[4]

$$\text{Nucleophilic attack: } f_A^+ = q_N^A - q_{N+1}^A \quad (\text{S15})$$

$$\text{Electrophilic attack: } f_A^- = q_{N-1}^A - q_N^A \quad (\text{S16})$$

$$\text{Radical attack: } f_A^0 = (q_{N-1}^A - q_{N+1}^A) / 2 \quad (\text{S17})$$

where  $q^A$  is the atomic charge of atom A at corresponding state. In this study, Hirshfeld charge was used to study reactive sites as it is considered to be one of the most suitable methods to calculate Fukui index.

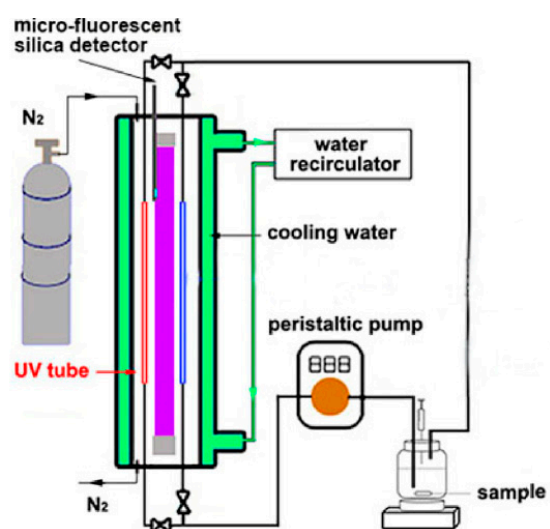

**Figure S1.** Schematic diagram of the MVPS [1].

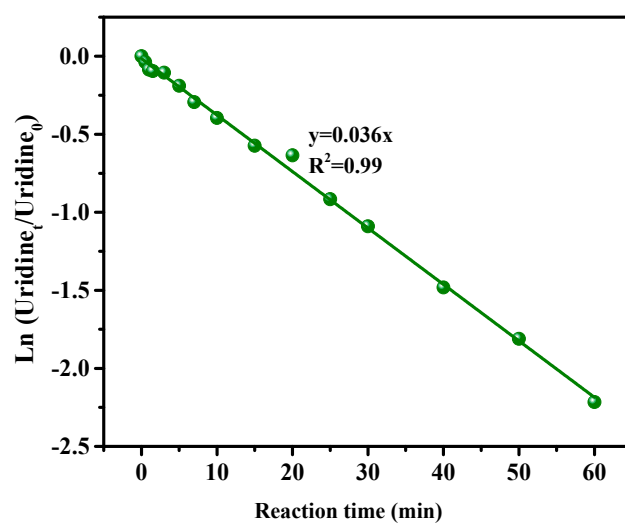

**Figure S2** The degradation of uridine under direct UV photolysis. Conditions:  
[Uridine]<sub>0</sub> = 0.01 mM, pH=6.0, T = 20°C.

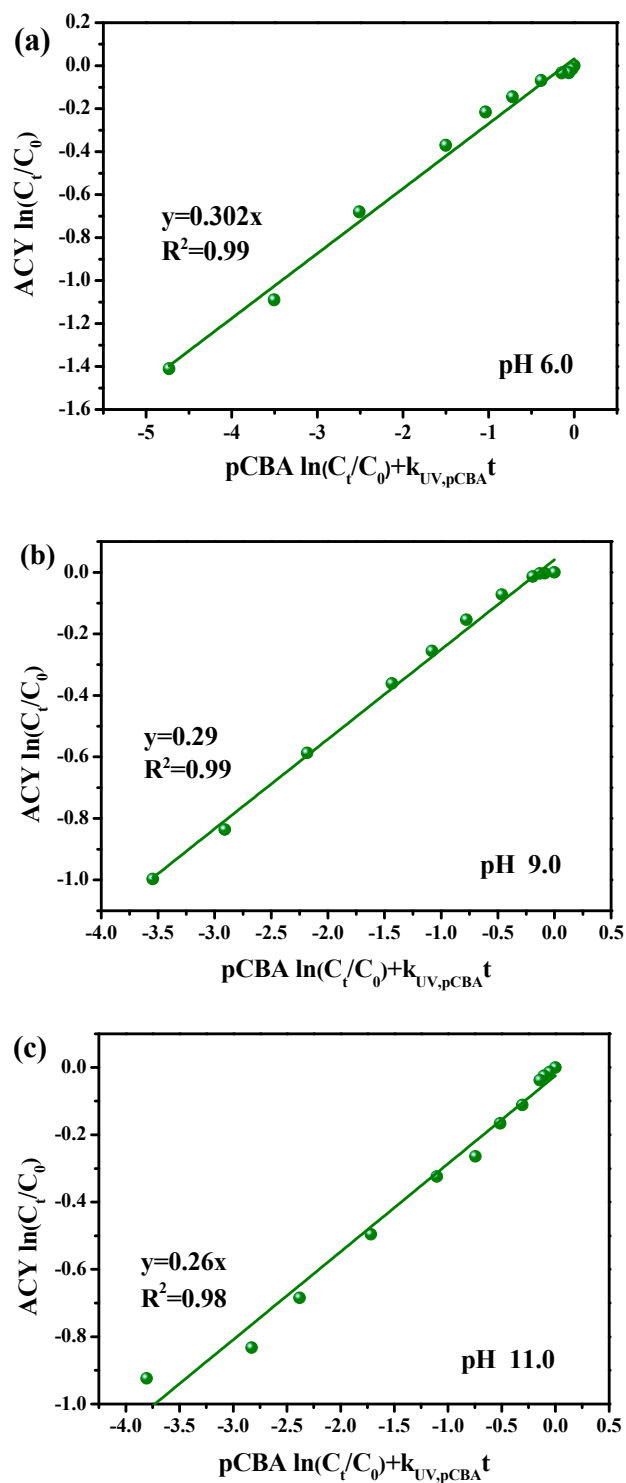

**Figure S3** Determination of the second-order rate constant for the reaction of ACY with  $\cdot\text{OH}$  at pH=6.0 (a), pH=9.0 (b), and pH=11.0 (c). Conditions:  $[\text{ACY}]_0 = 0.022 \text{ mM}$ ,  $[\text{pCBA}]_0 = 0.022 \text{ mM}$ ,  $[\text{H}_2\text{O}_2]_0 = 0.6 \text{ mM}$ ,  $E_{p,o,UV} = 1.12 \times 10^{-3} \text{ einstein m}^{-2} \text{ s}^{-1}$ ,  $T = 20^\circ\text{C}$ .

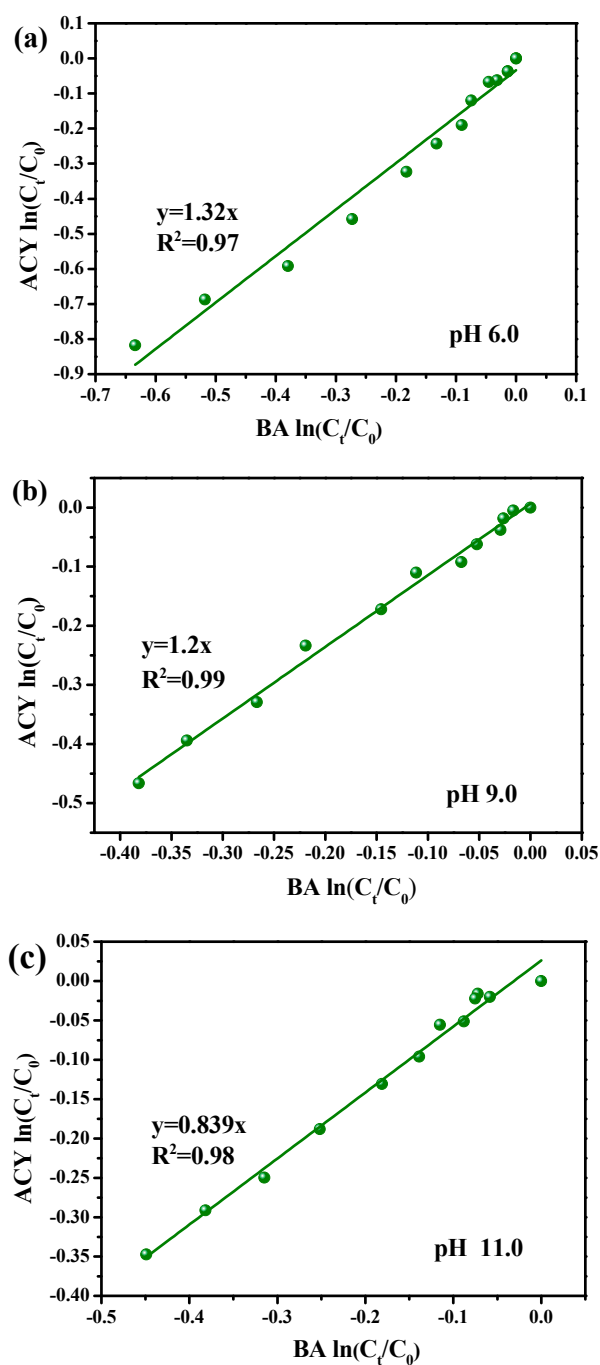

**Figure S4** Determination of the second-order rate constant for the reaction of ACY with  $\text{SO}_4^{\bullet-}$  at pH=6.0 (a), pH=9.0 (b), and pH=11.0 (c). Conditions:  $[\text{ACY}]_0 = 0.022 \text{ mM}$ ,  $[\text{BA}]_0 = 0.022 \text{ mM}$ ,  $[\text{PDS}]_0 = 0.6 \text{ mM}$ ,  $E_{p,o,UV} = 1.12 \times 10^{-3} \text{ einstein m}^{-2} \text{ s}^{-1}$ ,  $T = 20^\circ\text{C}$ .

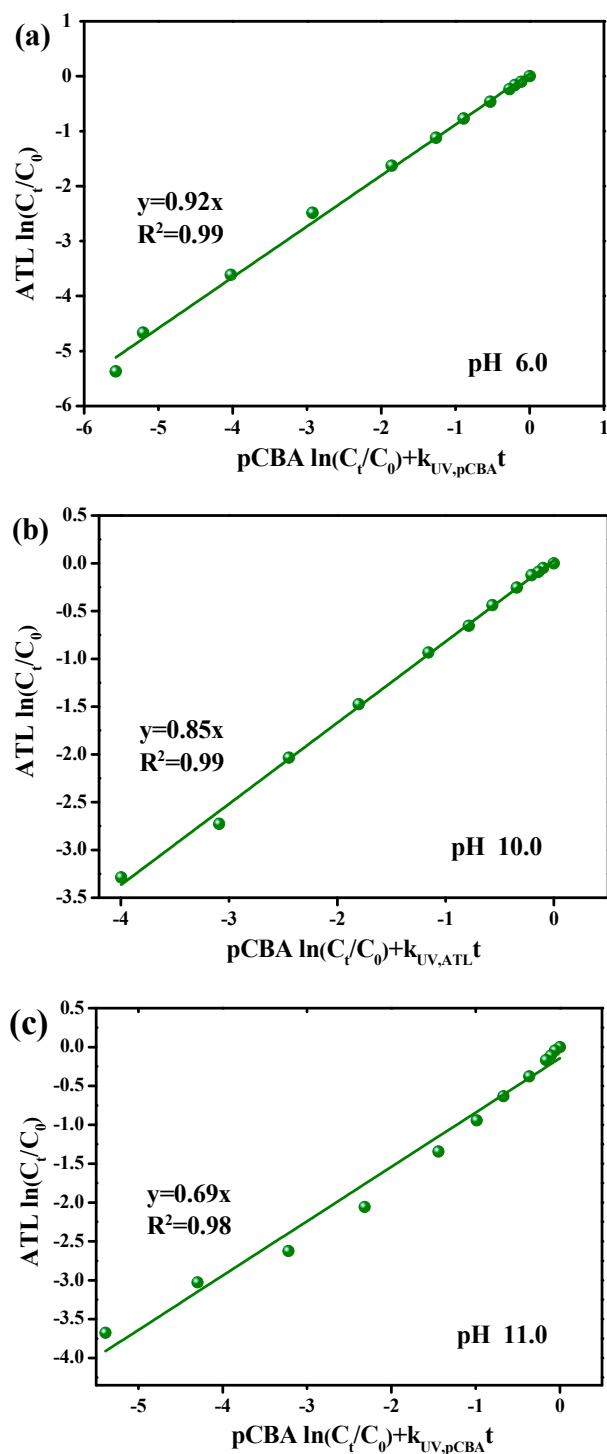

**Figure S5** Determination of the second-order rate constant for the reaction of ATL with  $\cdot\text{OH}$  at pH=6.0 (a), pH=9.0 (b), and pH=11.0 (c). Conditions:  $[\text{ATL}]_0 = 0.019 \text{ mM}$ ,  $[\text{pCBA}]_0 = 0.019 \text{ mM}$ ,  $[\text{H}_2\text{O}_2]_0 = 0.6 \text{ mM}$ ,  $E_{p,o,UV} = 1.12 \times 10^{-3} \text{ einstein m}^{-2} \text{ s}^{-1}$ ,  $T = 20^\circ\text{C}$ .

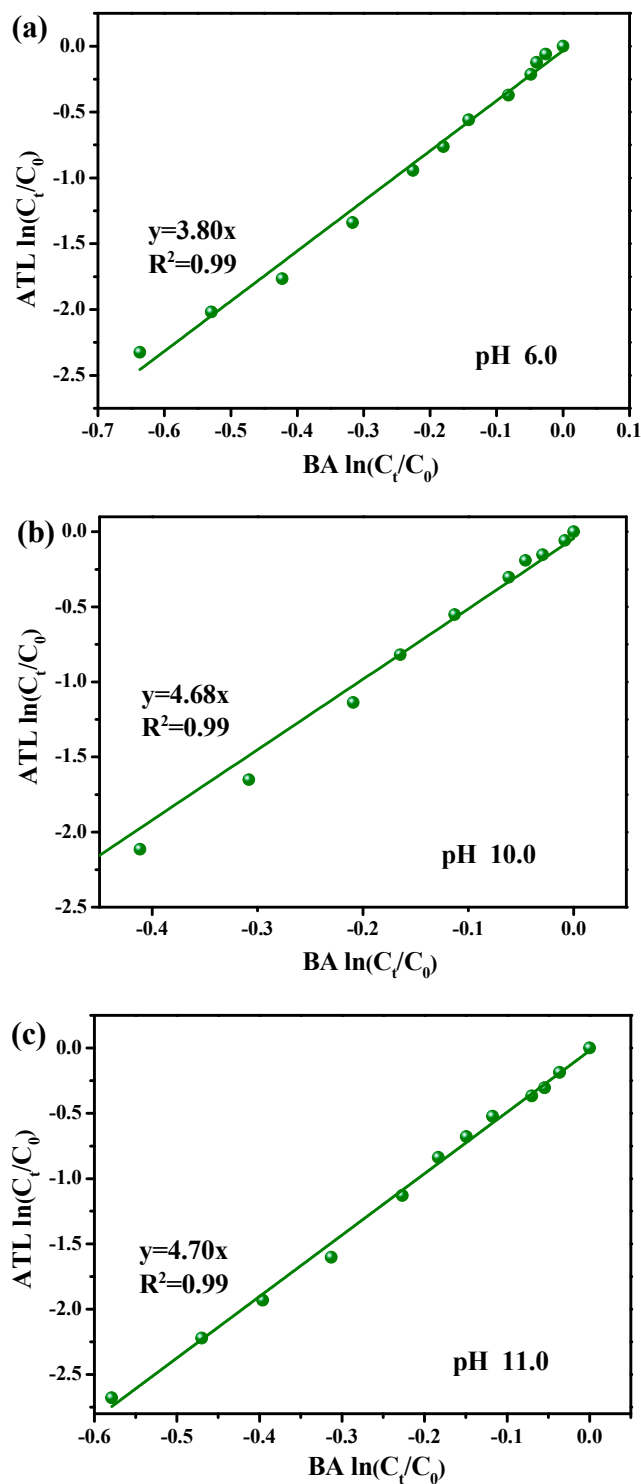

**Figure S6** Determination of the second-order rate constant for the reaction of ATL with  $\text{SO}_4^{\bullet-}$  pH=6.0 (a), pH=9.0 (b), and pH=11.0 (c). Conditions:  $[\text{ATL}]_0 = 0.019 \text{ mM}$ ,  $[\text{pCBA}]_0 = 0.019 \text{ mM}$ ,  $[\text{H}_2\text{O}_2]_0 = 0.6 \text{ mM}$ ,  $E_{p,o,UV} = 1.12 \times 10^{-3} \text{ einstein m}^{-2} \text{ s}^{-1}$ ,  $T = 20^\circ\text{C}$ .

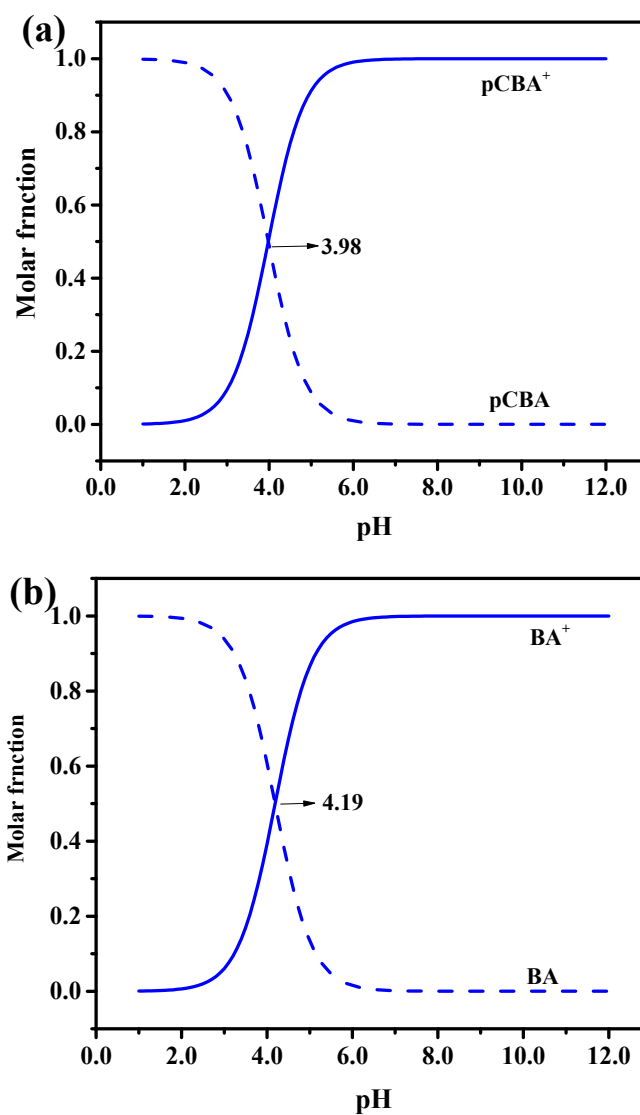

**Figure S7** The existence forms of competing substrates pCBA(a) and BA(b) at different pH. Conditions:  $[\text{ATL}]_0 = 0.019 \text{ mM}$ ,  $[\text{PDS}]_0 = 0.6 \text{ mM}$ ,  $E_{p,o,UV} = 1.12 \times 10^{-3} \text{ einstein m}^{-2} \text{ s}^{-1}$ ,  $T = 20^\circ\text{C}$ .



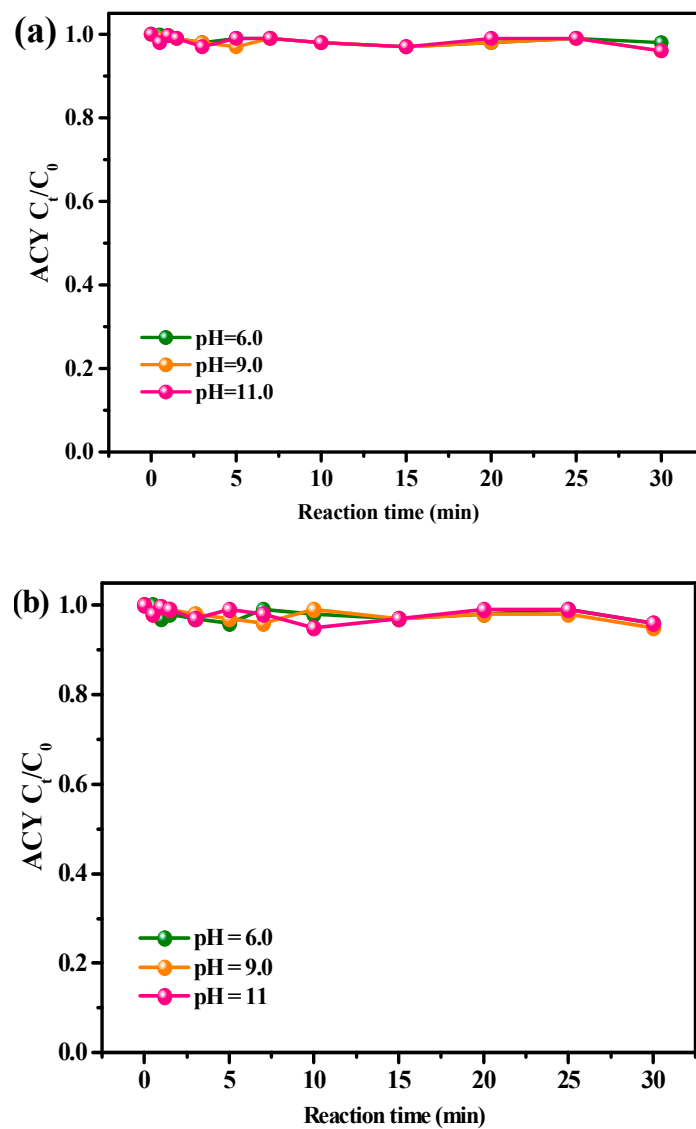

**Figure S8** Determination of ACY by UV irradiation (a) and PDS oxidation (b) at different pH. Conditions:  $[ACY]_0 = 0.022$  mM,  $[PDS]_0 = 0.6$  mM,  $E_{p,o,UV} = 1.12 \times 10^{-3}$  einstein  $m^{-2} s^{-1}$ ,  $T = 20^\circ C$ .

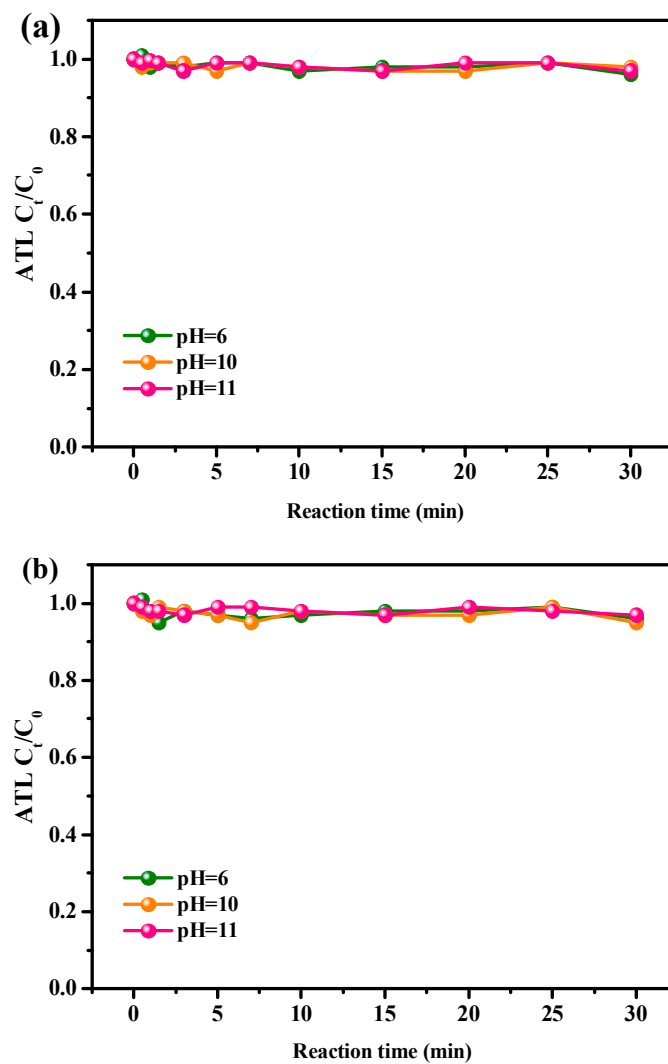

**Figure S9** Determination of ATL by UV irradiation (a) and PDS oxidation (b) at different pH. Conditions:  $[ATL]_0 = 0.019$  mM,  $[PDS]_0 = 0.6$  mM,  $E_{p,o,UV} = 1.12 \times 10^{-3}$  einstein  $m^{-2} s^{-1}$ ,  $T = 20^\circ C$ .

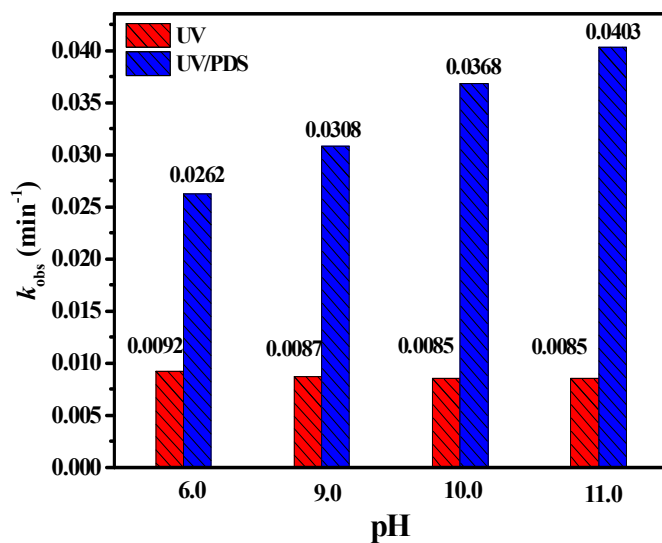

**Figure S10** The apparent degradation rate constants of NB in direct UV photolysis and UV/PDS processes at different pHs. Conditions:  $[\text{NB}]_0 = 0.02 \text{ mM}$ ,  $[\text{PDS}]_0 = 0.6 \text{ mM}$ ,  $E_{p,o,UV} = 1.12 \times 10^{-3} \text{ einstein m}^{-2} \text{ s}^{-1}$ ,  $T = 20^\circ\text{C}$ .

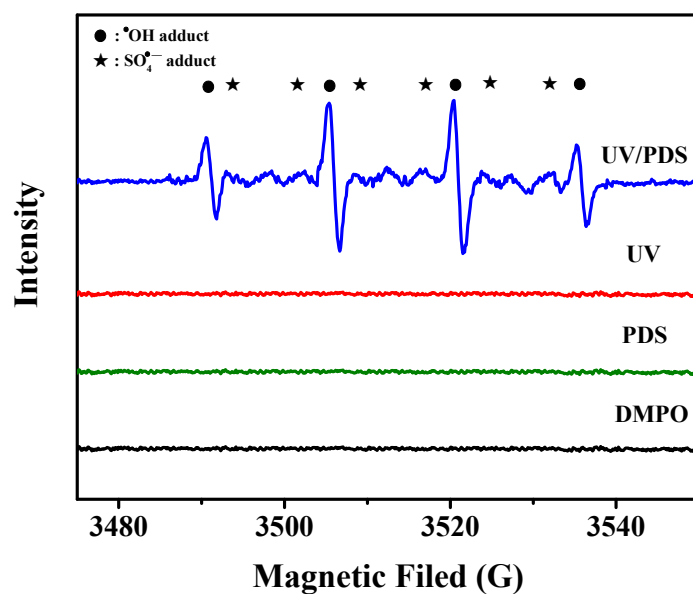

**Figure S11** EPR spectra of  $\cdot\text{OH}$  and  $\text{SO}_4^{\cdot-}$  adducts in UV/PDS process. Conditions:  $[\text{PDS}]_0 = 0.6 \text{ mM}$ ,  $E_{p,o,UV} = 1.12 \times 10^{-3} \text{ einstein m}^{-2} \text{ s}^{-1}$ ,  $\text{pH} = 6.0$ ,  $T = 20^\circ\text{C}$ .

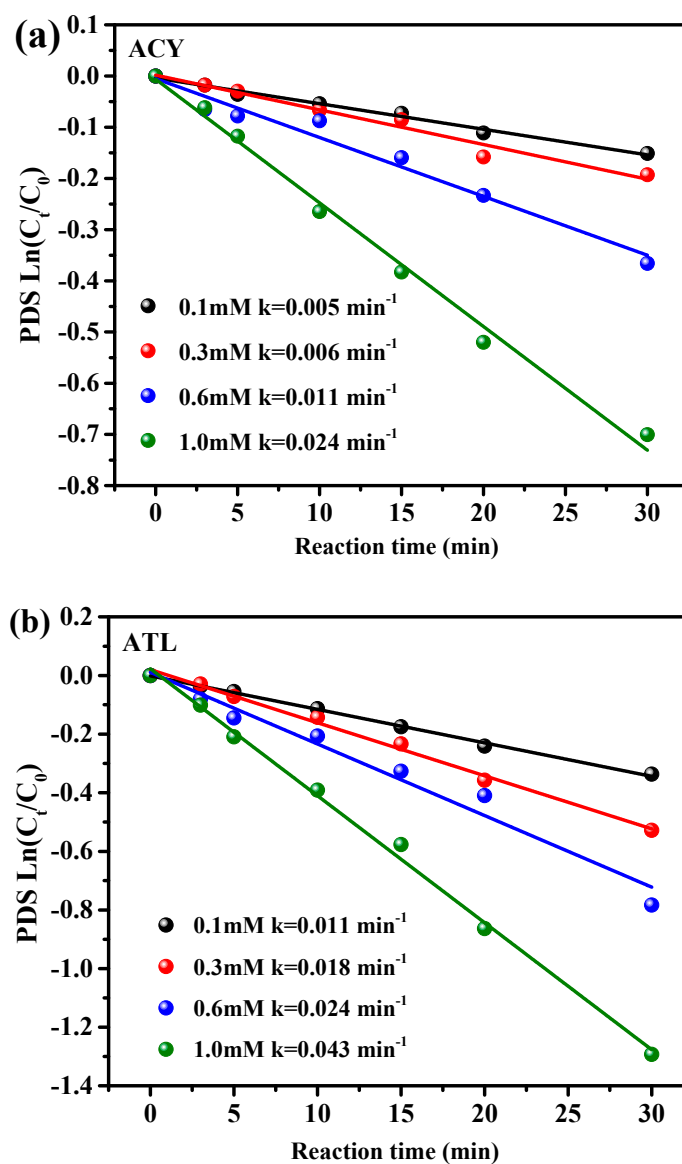

**Figure S12** Attenuation of PDS in UV/PDS process for the degradation of ACY (a) and ATL (b). Conditions:  $[\text{ACY}]_0 = 0.022 \text{ mM}$ ,  $[\text{ATL}]_0 = 0.019 \text{ mM}$ ,  $[\text{PDS}]_0 = 0.6 \text{ mM}$ ,  $E_{p,o,UV} = 1.12 \times 10^{-3} \text{ einstein m}^{-2} \text{ s}^{-1}$ ,  $\text{pH} = 6.0$ ,  $T = 20^\circ\text{C}$ .

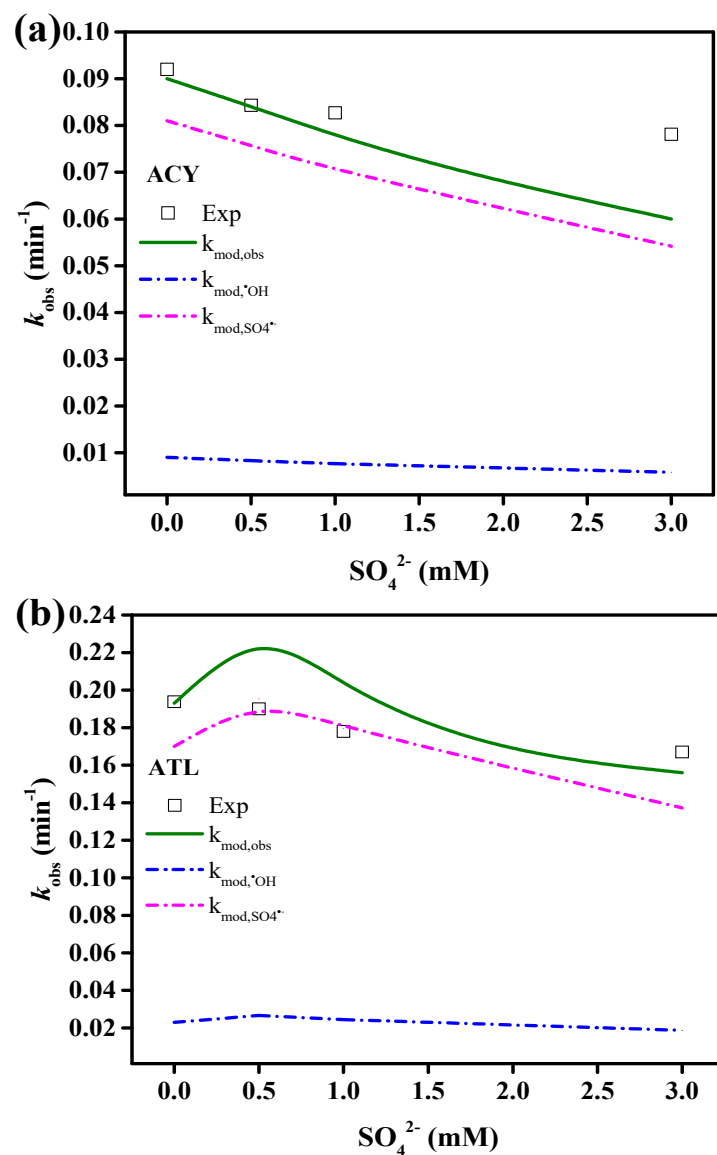

**Figure S13** Effect of  $\text{SO}_4^{2-}$  dosage on the  $k_{\text{obs}}$  of ACY (a) and ATL (b) degradation and specific rates of  $\cdot\text{OH}$  and  $\text{SO}_4^{\cdot-}$  in the UV/PDS process. Conditions:  $[\text{ACY}]_0 = 0.022$  mM,  $[\text{ATL}]_0 = 0.019$  mM,  $[\text{PDS}]_0 = 0.6$  mM,  $E_{p,o,UV} = 1.12 \times 10^{-3}$  einstein  $\text{m}^{-2} \text{s}^{-1}$ , pH = 6.0,  $T = 20^\circ\text{C}$ .

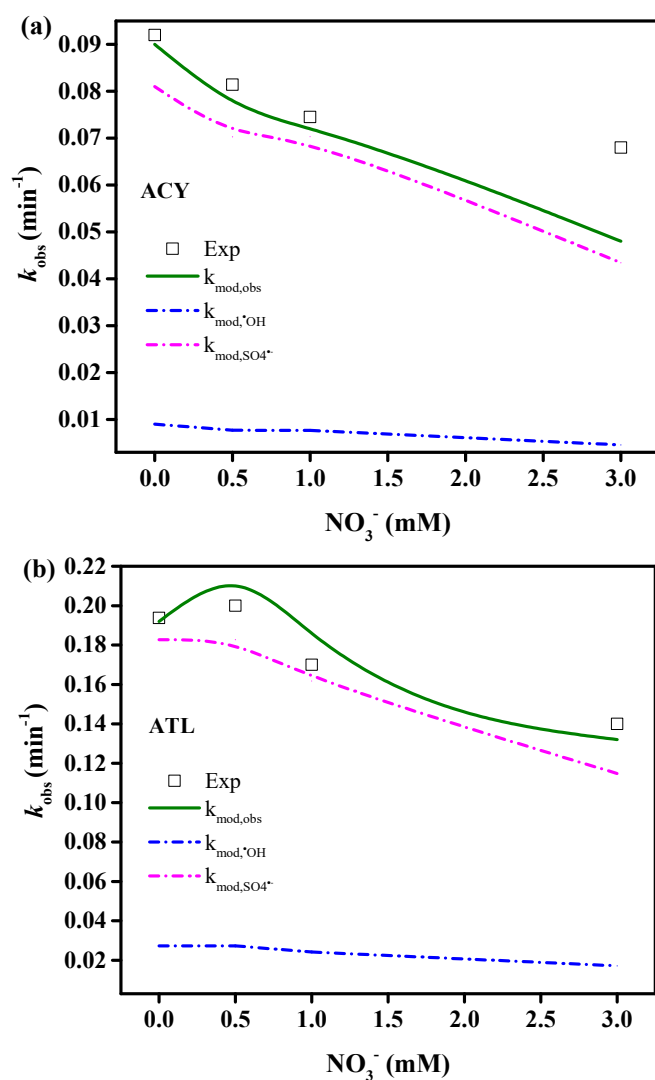

**Figure S14** Effect of  $\text{NO}_3^-$  dosage on the  $k_{\text{obs}}$  of ACY (a) and ATL (b) degradation and specific rates of  $\cdot\text{OH}$  and  $\text{SO}_4^{\cdot-}$  in UV/PDS process. Conditions:  $[\text{ACY}]_0 = 0.022$  mM,  $[\text{ATL}]_0 = 0.019$  mM,  $[\text{PDS}]_0 = 0.6$  mM,  $E_{p,o,UV} = 1.12 \times 10^{-3}$  einstein  $\text{m}^{-2} \text{s}^{-1}$ , pH = 6.0 , T = 20°C.



**Table S1.** Principal reactions and rate constants in the UV/PDS system.

| No                                                                           | Reaction                                                   | Rate Constant                                                                           | Reference |
|------------------------------------------------------------------------------|------------------------------------------------------------|-----------------------------------------------------------------------------------------|-----------|
| <b>Photolysis of PDS</b>                                                     |                                                            |                                                                                         |           |
| 1                                                                            | $S_2O_8^{2-} + h\nu \rightarrow 2SO_4^{\bullet-}$          | $r_{SO_4^{\bullet-},form} = \Phi_{SO_4^{\bullet-}} I_0 f_{S_2O_8^{2-}} (1 - 10^{-A_I})$ | [5]       |
| <b><math>\bullet OH</math> and <math>SO_4^{\bullet-}</math> reactions[6]</b> |                                                            |                                                                                         |           |
| 2                                                                            | $H_2O \rightarrow H^+ + OH^-$                              | $1.0 \times 10^3 \text{ s}^{-1}$                                                        | [6]       |
| 3                                                                            | $H^+ + OH^- \rightarrow H_2O$                              | $1.0 \times 10^{11} \text{ M}^{-1} \text{ s}^{-1}$                                      | [6]       |
| 4                                                                            | $H_2O_2 \rightarrow HO_2^- + H^+$                          | $1.3 \times 10^{-1} \text{ s}^{-1}$                                                     | [6]       |
| 5                                                                            | $HO_2^- + H^+ \rightarrow H_2O_2$                          | $5.0 \times 10^{10} \text{ M}^{-1} \text{ s}^{-1}$                                      | [6]       |
| 6                                                                            | $HO_2^{\bullet} \rightarrow O_2^{\bullet-} + H^+$          | $7.0 \times 10^5 \text{ s}^{-1}$                                                        | [7]       |
| 7                                                                            | $O_2^{\bullet-} + H^+ \rightarrow HO_2^{\bullet}$          | $5.0 \times 10^{10} \text{ M}^{-1} \text{ s}^{-1}$                                      | [7]       |
| 8                                                                            | $HO_2^{\bullet} + O_2^{\bullet-} \rightarrow HO_2^- + O_2$ | $9.7 \times 10^7 \text{ M}^{-1} \text{ s}^{-1}$                                         | [7]       |
| 9                                                                            | $HO_2^{\bullet} + HO_2^{\bullet} \rightarrow H_2O_2 + O_2$ | $8.3 \times 10^5 \text{ M}^{-1} \text{ s}^{-1}$                                         | [6]       |



| No | Reaction                                                                                                        | Rate Constant                                      | Reference |
|----|-----------------------------------------------------------------------------------------------------------------|----------------------------------------------------|-----------|
| 10 | $\cdot\text{OH} + \cdot\text{OH} \rightarrow \text{H}_2\text{O}_2$                                              | $5.5 \times 10^9 \text{ M}^{-1} \text{ s}^{-1}$    | [6]       |
| 11 | $\cdot\text{OH} + \text{HO}_2\cdot \rightarrow \text{H}_2\text{O} + \text{O}_2$                                 | $7.1 \times 10^9 \text{ M}^{-1} \text{ s}^{-1}$    | [7]       |
| 12 | $\cdot\text{OH} + \text{O}_2^{\cdot-} \rightarrow \text{OH}^- + \text{O}_2$                                     | $1.0 \times 10^{10} \text{ M}^{-1} \text{ s}^{-1}$ | [7]       |
| 13 | $\cdot\text{OH} + \text{H}_2\text{O}_2 \rightarrow \text{HO}_2\cdot + \text{H}_2\text{O}$                       | $2.7 \times 10^7 \text{ M}^{-1} \text{ s}^{-1}$    | [8]       |
| 14 | $\cdot\text{OH} + \text{HO}_2^- \rightarrow \text{H}_2\text{O} + \text{O}_2^{\cdot-}$                           | $7.5 \times 10^9 \text{ M}^{-1} \text{ s}^{-1}$    | [8]       |
| 15 | $2\text{H}_2\text{O}_2 \rightarrow 2\text{H}_2\text{O} + \text{O}_2$                                            | $2.3 \times 10^{-2} \text{ s}^{-1}$                | [6]       |
| 16 | $\text{SO}_4^{\cdot-} + \text{SO}_4^{\cdot-} \rightarrow \text{S}_2\text{O}_8^{2-}$                             | $4.0 \times 10^8 \text{ M}^{-1} \text{ s}^{-1}$    | [8]       |
| 17 | $\text{SO}_4^{\cdot-} + \text{OH}^- \rightarrow \cdot\text{OH} + \text{SO}_4^{2-}$                              | $6.5 \times 10^7 \text{ M}^{-1} \text{ s}^{-1}$    | [8]       |
| 18 | $\cdot\text{OH} + \text{SO}_4^{\cdot-} \rightarrow \text{HSO}_5^-$                                              | $1.0 \times 10^{10} \text{ M}^{-1} \text{ s}^{-1}$ | [8]       |
| 19 | $\cdot\text{OH} + \text{HSO}_5^- \rightarrow \text{SO}_5^{\cdot-} + \text{H}_2\text{O}$                         | $1.7 \times 10^7 \text{ M}^{-1} \text{ s}^{-1}$    | [8]       |
| 20 | $\text{SO}_4^{\cdot-} + \text{HSO}_5^- \rightarrow \text{SO}_5^{\cdot-} + \text{HSO}_4^-$                       | $1.0 \times 10^5 \text{ M}^{-1} \text{ s}^{-1}$    | [9]       |
| 21 | $\text{SO}_4^{\cdot-} + \text{S}_2\text{O}_8^{2-} \rightarrow \text{SO}_4^{2-} + \text{S}_2\text{O}_8^{\cdot-}$ | $6.1 \times 10^5 \text{ M}^{-1} \text{ s}^{-1}$    | [9]       |

| No                                                    | Reaction                                                                                                        | Rate Constant                                   | Reference |
|-------------------------------------------------------|-----------------------------------------------------------------------------------------------------------------|-------------------------------------------------|-----------|
| 22                                                    | $\text{SO}_4^{\bullet-} + \text{H}_2\text{O} \rightarrow \text{HSO}_4^- + \bullet\text{OH}$                     | $5.0 \times 10^2 \text{ M}^{-1} \text{ s}^{-1}$ | [8]       |
| 23                                                    | $\text{HSO}_4^- + \bullet\text{OH} \rightarrow \text{SO}_4^{\bullet-} + \text{H}_2\text{O}$                     | $6.9 \times 10^5 \text{ M}^{-1} \text{ s}^{-1}$ | [8]       |
| 24                                                    | $2\text{SO}_5^{\bullet-} \rightarrow 2\text{SO}_4^{\bullet-} + \text{O}_2$                                      | $1.0 \times 10^8 \text{ s}^{-1}$                | [8]       |
| 25                                                    | $\text{HSO}_4^- \rightarrow \text{SO}_4^{2-} + \text{H}^+$                                                      | $1.2 \times 10^{-2} \text{ s}^{-1}$             | [8]       |
| <b>In the presence of <math>\text{HCO}_3^-</math></b> |                                                                                                                 |                                                 |           |
| 26                                                    | $\text{SO}_4^{\bullet-} + \text{HCO}_3^- \rightarrow \text{CO}_3^{\bullet-} + \text{SO}_4^{2-} + \text{H}^+$    | $9.1 \times 10^6 \text{ M}^{-1} \text{ s}^{-1}$ | [10]      |
| 27                                                    | $\text{SO}_4^{\bullet-} + \text{CO}_3^{2-} \rightarrow \text{CO}_3^{\bullet-} + \text{SO}_4^{2-}$               | $4.1 \times 10^6 \text{ M}^{-1} \text{ s}^{-1}$ | [10]      |
| 28                                                    | $\bullet\text{OH} + \text{HCO}_3^- \rightarrow \text{CO}_3^{\bullet-} + \text{H}_2\text{O}$                     | $8.5 \times 10^6 \text{ M}^{-1} \text{ s}^{-1}$ | [10]      |
| 29                                                    | $\bullet\text{OH} + \text{CO}_3^{2-} \rightarrow \text{CO}_3^{\bullet-} + \text{OH}^-$                          | $3.9 \times 10^8 \text{ M}^{-1} \text{ s}^{-1}$ | [10]      |
| 30                                                    | $\bullet\text{OH} + \text{H}_2\text{CO}_3 \rightarrow \text{CO}_3^{\bullet-} + \text{H}_2\text{O} + \text{H}^+$ | $1.0 \times 10^6 \text{ M}^{-1} \text{ s}^{-1}$ | [10]      |
| 31                                                    | $\bullet\text{OH} + \text{CO}_3^{\bullet-} \rightarrow \text{products}$                                         | $3.0 \times 10^9 \text{ M}^{-1} \text{ s}^{-1}$ | [10]      |
| 32                                                    | $\text{CO}_3^{\bullet-} + \text{CO}_3^{\bullet-} \rightarrow \text{products}$                                   | $3.0 \times 10^7 \text{ M}^{-1} \text{ s}^{-1}$ | [10]      |

| No                                                 | Reaction                                                                            | Rate Constant                                      | Reference |
|----------------------------------------------------|-------------------------------------------------------------------------------------|----------------------------------------------------|-----------|
| 33                                                 | $\text{HCO}_3^- + \text{H}^+ \rightarrow \text{H}_2\text{CO}_3$                     | $1.0 \times 10^{10} \text{ M}^{-1} \text{ s}^{-1}$ | [10]      |
| 34                                                 | $\text{H}_2\text{CO}_3 \rightarrow \text{HCO}_3^- + \text{H}^+$                     | $5.0 \times 10^5 \text{ s}^{-1}$                   | [10]      |
| 35                                                 | $\text{CO}_3^{2-} + \text{H}^+ \rightarrow \text{HCO}_3^-$                          | $5.0 \times 10^{10} \text{ M}^{-1} \text{ s}^{-1}$ | [10]      |
| 36                                                 | $\text{HCO}_3^- \rightarrow \text{CO}_3^{2-} + \text{H}^+$                          | $2.5 \text{ s}^{-1}$                               | [10]      |
| <b>In the presence of <math>\text{Cl}^-</math></b> |                                                                                     |                                                    |           |
| 37                                                 | $\text{HCl} \rightarrow \text{H}^+ + \text{Cl}^-$                                   | $8.6 \times 10^{16} \text{ s}^{-1}$                | [6]       |
| 38                                                 | $\text{H}^+ + \text{Cl}^- \rightarrow \text{HCl}$                                   | $5.0 \times 10^{10} \text{ M}^{-1} \text{ s}^{-1}$ | [6]       |
| 39                                                 | $\text{HClO} \rightarrow \text{H}^+ + \text{ClO}^-$                                 | $1.6 \times 10^3 \text{ s}^{-1}$                   | [6]       |
| 40                                                 | $\text{H}^+ + \text{ClO}^- \rightarrow \text{HClO}$                                 | $5.0 \times 10^{10} \text{ M}^{-1} \text{ s}^{-1}$ | [6]       |
| 41                                                 | $\text{Cl}^- + \cdot\text{OH} \rightarrow \text{ClOH}^{\cdot-}$                     | $4.3 \times 10^9 \text{ M}^{-1} \text{ s}^{-1}$    | [6]       |
| 42                                                 | $\text{ClOH}^{\cdot-} + \text{Cl}^- \rightarrow \text{Cl}_2^{\cdot-} + \text{OH}^-$ | $1.0 \times 10^5 \text{ M}^{-1} \text{ s}^{-1}$    | [6]       |
| 43                                                 | $\text{ClOH}^{\cdot-} \rightarrow \text{Cl}^- + \cdot\text{OH}$                     | $6.1 \times 10^9 \text{ s}^{-1}$                   | [6]       |

| No | Reaction                                                                                    | Rate Constant                                      | Reference |
|----|---------------------------------------------------------------------------------------------|----------------------------------------------------|-----------|
| 44 | $\text{ClOH}^{\bullet-} + \text{H}^+ \rightarrow \text{Cl}^{\bullet} + \text{H}_2$          | $2.1 \times 10^{10} \text{ M}^{-1} \text{ s}^{-1}$ | [6]       |
| 45 | $\text{Cl}^- + \text{Cl}^{\bullet} \rightarrow \text{Cl}_2^{\bullet-}$                      | $6.5 \times 10^9 \text{ M}^{-1} \text{ s}^{-1}$    | [6]       |
| 46 | $\text{Cl}^- + \text{Cl}_2 \rightarrow \text{Cl}_3^-$                                       | $2.0 \times 10^4 \text{ M}^{-1} \text{ s}^{-1}$    | [6]       |
| 47 | $\text{Cl}^- + \text{HClO} \rightarrow \text{Cl}_2\text{OH}^-$                              | $1.5 \times 10^4 \text{ M}^{-1} \text{ s}^{-1}$    | [7]       |
| 48 | $\text{Cl}^{\bullet} + \text{H}_2\text{O}_2 \rightarrow \text{HCl} + \text{HO}_2^{\bullet}$ | $4.0 \times 10^9 \text{ M}^{-1} \text{ s}^{-1}$    | [7]       |
| 49 | $\text{Cl}^{\bullet} + \text{OH}^- \rightarrow \text{ClOH}^{\bullet-}$                      | $1.8 \times 10^{10} \text{ M}^{-1} \text{ s}^{-1}$ | [6]       |
| 50 | $\text{Cl}^{\bullet} + \text{Cl}^{\bullet} \rightarrow \text{Cl}_2$                         | $1.0 \times 10^8 \text{ M}^{-1} \text{ s}^{-1}$    | [6]       |
| 51 | $\text{Cl}^{\bullet} + \text{H}_2\text{O} \rightarrow \text{HClOH}$                         | $2.5 \times 10^5 \text{ M}^{-1} \text{ s}^{-1}$    | [6]       |
| 52 | $\text{Cl}^{\bullet} + \text{H}_2\text{O} \rightarrow \text{ClOH}^{\bullet-} + \text{H}^+$  | $1.6 \times 10^5 \text{ M}^{-1} \text{ s}^{-1}$    | [6]       |
| 53 | $\text{Cl}_2^{\bullet-} + \text{O}_2^{\bullet-} \rightarrow 2\text{Cl}^- + \text{O}_2$      | $1.0 \times 10^9 \text{ M}^{-1} \text{ s}^{-1}$    | [6]       |
| 54 | $\text{Cl}_2^{\bullet-} + \text{OH}^- \rightarrow \text{ClOH}^{\bullet-} + \text{Cl}^-$     | $4.5 \times 10^7 \text{ M}^{-1} \text{ s}^{-1}$    | [6]       |
| 55 | $\text{Cl}_2^{\bullet-} \rightarrow \text{Cl}^{\bullet} + \text{Cl}^-$                      | $1.1 \times 10^5 \text{ s}^{-1}$                   | [6]       |

| No | Reaction                                                                                                      | Rate Constant                                   | Reference |
|----|---------------------------------------------------------------------------------------------------------------|-------------------------------------------------|-----------|
| 56 | $\text{Cl}_2^{\bullet-} + \text{Cl}_2^{\bullet-} \rightarrow \text{Cl}_2 + 2\text{Cl}^-$                      | $8.3 \times 10^8 \text{ M}^{-1} \text{ s}^{-1}$ | [6]       |
| 57 | $\text{Cl}_2^{\bullet-} + \text{H}_2\text{O}_2 \rightarrow 2\text{Cl}^- + \text{HO}_2^{\bullet} + \text{H}^+$ | $1.4 \times 10^5 \text{ M}^{-1} \text{ s}^{-1}$ | [6]       |
| 58 | $\text{Cl}_2^{\bullet-} + \text{H}_2\text{O} \rightarrow \text{HClOH} + \text{Cl}^-$                          | $1.3 \times 10^3 \text{ M}^{-1} \text{ s}^{-1}$ | [6]       |
| 59 | $\text{Cl}_2^{\bullet-} + \cdot\text{OH} \rightarrow \text{HClO} + \text{Cl}^-$                               | $1.0 \times 10^9 \text{ M}^{-1} \text{ s}^{-1}$ | [6]       |
| 60 | $\text{HClOH} \rightarrow \text{ClOH}^{\bullet-} + \text{H}^+$                                                | $1.0 \times 10^8 \text{ M}^{-1} \text{ s}^{-1}$ | [6]       |
| 61 | $\text{HClOH} \rightarrow \text{Cl}^{\bullet} + \text{H}_2\text{O}$                                           | $1.0 \times 10^2 \text{ s}^{-1}$                | [6]       |
| 62 | $\text{HClOH} + \text{Cl}^- \rightarrow \text{Cl}_2^{\bullet-} + \text{H}_2\text{O}$                          | $5.0 \times 10^9 \text{ M}^{-1} \text{ s}^{-1}$ | [6]       |
| 63 | $\text{Cl}_3^- + \text{HO}_2^{\bullet} \rightarrow \text{Cl}_2^{\bullet-} + \text{HCl} + \text{O}_2$          | $1.0 \times 10^9 \text{ M}^{-1} \text{ s}^{-1}$ | [6]       |
| 64 | $\text{Cl}_3^- + \text{O}_2^{\bullet-} \rightarrow \text{Cl}_2^{\bullet-} + \text{Cl}^- + \text{O}_2$         | $3.8 \times 10^9 \text{ M}^{-1} \text{ s}^{-1}$ | [6]       |
| 65 | $\text{Cl}_3^- \rightarrow \text{Cl}_2 + \text{Cl}^-$                                                         | $1.1 \times 10^5 \text{ s}^{-1}$                | [6]       |
| 66 | $\text{Cl}_2 + \text{O}_2^{\bullet-} \rightarrow \text{Cl}_2^{\bullet-} + \text{O}_2$                         | $1.0 \times 10^9 \text{ M}^{-1} \text{ s}^{-1}$ | [6]       |
| 67 | $\text{Cl}_2 + \text{HO}_2^{\bullet} \rightarrow \text{Cl}_2^{\bullet-} + \text{H}^+ + \text{O}_2$            | $1.0 \times 10^9 \text{ M}^{-1} \text{ s}^{-1}$ | [8]       |

| No | Reaction                                                                                                         | Rate Constant                                      | Reference |
|----|------------------------------------------------------------------------------------------------------------------|----------------------------------------------------|-----------|
| 68 | $\text{Cl}_2 + \text{H}_2\text{O} \rightarrow \text{Cl}_2\text{OH}^- + \text{H}^+$                               | $1.5 \times 10^1 \text{ M}^{-1} \text{ s}^{-1}$    | [6]       |
| 69 | $\text{Cl}_2 + \text{H}_2\text{O}_2 \rightarrow 2\text{HCl} + \text{O}_2$                                        | $1.3 \times 10^4 \text{ M}^{-1} \text{ s}^{-1}$    | [6]       |
| 70 | $\text{Cl}_2\text{OH}^- + \text{H}^+ \rightarrow \text{Cl}_2 + \text{H}_2\text{O}$                               | $2.0 \times 10^{10} \text{ M}^{-1} \text{ s}^{-1}$ | [6]       |
| 71 | $\text{Cl}_2\text{OH}^- \rightarrow \text{HClO} + \text{Cl}^-$                                                   | $5.5 \times 10^9 \text{ s}^{-1}$                   | [6]       |
| 72 | $\text{HClO} + \cdot\text{OH} \rightarrow \text{ClO}\cdot + \text{H}_2\text{O}$                                  | $2.0 \times 10^9 \text{ M}^{-1} \text{ s}^{-1}$    | [8]       |
| 73 | $\text{HClO} + \text{O}_2^{\cdot-} \rightarrow \text{Cl}\cdot + \text{OH}^- + \text{O}_2$                        | $7.5 \times 10^6 \text{ M}^{-1} \text{ s}^{-1}$    | [8]       |
| 74 | $\text{HClO} + \text{HO}_2\cdot \rightarrow \text{Cl}\cdot + \text{H}_2\text{O} + \text{O}_2$                    | $7.5 \times 10^6 \text{ M}^{-1} \text{ s}^{-1}$    | [6]       |
| 75 | $\text{HClO} + \text{H}_2\text{O}_2 \rightarrow \text{HCl} + \text{H}_2\text{O} + \text{O}_2$                    | $1.1 \times 10^4 \text{ M}^{-1} \text{ s}^{-1}$    | [6]       |
| 76 | $\text{ClO}^- + \cdot\text{OH} \rightarrow \text{ClO}\cdot + \text{OH}^-$                                        | $8.8 \times 10^9 \text{ M}^{-1} \text{ s}^{-1}$    | [6]       |
| 77 | $\text{ClO}^- + \text{H}_2\text{O}_2 \rightarrow \text{Cl}^- + \text{H}_2\text{O} + \text{O}_2$                  | $1.7 \times 10^5 \text{ M}^{-1} \text{ s}^{-1}$    | [6]       |
| 78 | $\text{ClO}^- + \text{O}_2^{\cdot-} + \text{H}_2\text{O} \rightarrow \text{Cl}\cdot + 2\text{OH}^- + \text{O}_2$ | $2.0 \times 10^8 \text{ M}^{-1} \text{ s}^{-1}$    | [6]       |
| 79 | $\text{Cl}_2^{\cdot-} + \text{HO}_2\cdot \rightarrow 2\text{Cl}^- + \text{H}^+ + \text{O}_2$                     | $3.0 \times 10^9 \text{ M}^{-1} \text{ s}^{-1}$    | [6]       |

| No                                                   | Reaction                                                                                                 | Rate Constant                                   | Reference |
|------------------------------------------------------|----------------------------------------------------------------------------------------------------------|-------------------------------------------------|-----------|
| 80                                                   | $\text{Cl}_2 + \text{H}_2\text{O} \rightarrow \text{Cl}_2\text{OH}^- + \text{H}^+$                       | $1.5 \times 10^1 \text{ M}^{-1} \text{ s}^{-1}$ | [6]       |
| 81                                                   | $\text{SO}_4^{\bullet-} + \text{Cl}^- \rightarrow \text{SO}_4^{2-} + \text{Cl}^\bullet$                  | $4.7 \times 10^8 \text{ M}^{-1} \text{ s}^{-1}$ | [9]       |
| 82                                                   | $\text{SO}_4^{2-} + \text{Cl}^\bullet \rightarrow \text{SO}_4^{\bullet-} + \text{Cl}^-$                  | $2.5 \times 10^8 \text{ M}^{-1} \text{ s}^{-1}$ | [9]       |
| 83                                                   | $\text{OCl}^- + \text{CO}_3^{\bullet-} \rightarrow \text{CO}_3^{2-} + \text{ClO}^\bullet$                | $5.7 \times 10^5 \text{ M}^{-1} \text{ s}^{-1}$ | [11]      |
| 84                                                   | $\text{Cl}^\bullet + \text{CO}_3^{2-} \rightarrow \text{CO}_3^{\bullet-} + \text{Cl}^-$                  | $5.0 \times 10^8 \text{ M}^{-1} \text{ s}^{-1}$ | [11]      |
| 85                                                   | $\text{Cl}^\bullet + \text{HCO}_3^- \rightarrow \text{CO}_3^{\bullet-} + \text{Cl}^- + \text{H}^+$       | $2.2 \times 10^8 \text{ M}^{-1} \text{ s}^{-1}$ | [11]      |
| 86                                                   | $\text{Cl}_2^{\bullet-} + \text{CO}_3^{2-} \rightarrow \text{CO}_3^{\bullet-} + 2\text{Cl}^-$            | $1.6 \times 10^8 \text{ M}^{-1} \text{ s}^{-1}$ | [11]      |
| 87                                                   | $\text{Cl}_2^{\bullet-} + \text{HCO}_3^- \rightarrow \text{CO}_3^{\bullet-} + 2\text{Cl}^- + \text{H}^+$ | $8.0 \times 10^7 \text{ M}^{-1} \text{ s}^{-1}$ | [11]      |
| <b>In the presence of <math>\text{NO}_3^-</math></b> |                                                                                                          |                                                 |           |
| 88                                                   | $\text{NO}_3^\bullet + \text{NO}_3^\bullet \rightarrow \text{N}_2\text{O}_6$                             | $7.9 \times 10^5 \text{ M}^{-1} \text{ s}^{-1}$ | [11]      |
| 89                                                   | $\text{NO}_3^\bullet + \text{Cl}^- \rightarrow \text{NO}_3^- + \text{Cl}^\bullet$                        | $7.1 \times 10^7 \text{ M}^{-1} \text{ s}^{-1}$ | [11]      |
| <b>In the presence of NOM</b>                        |                                                                                                          |                                                 |           |

| No                                                                               | Reaction                                                                                                        | Rate Constant                                      | Reference |
|----------------------------------------------------------------------------------|-----------------------------------------------------------------------------------------------------------------|----------------------------------------------------|-----------|
| 90                                                                               | $\text{SO}_4^{\bullet-} + \text{NOM} \rightarrow \text{products}$                                               | $2.35 \times 10^7 \text{ M}^{-1} \text{ s}^{-1}$   | [10]      |
| 91                                                                               | $\text{HO}^{\bullet} + \text{NOM} \rightarrow \text{products}$                                                  | $3.0 \times 10^8 \text{ M}^{-1} \text{ s}^{-1}$    | [10]      |
| 92                                                                               | $\text{CO}_3^{\bullet-} + \text{NOM} \rightarrow \text{products}$                                               | $2.8 \times 10^2 \text{ M}^{-1} \text{ s}^{-1}$    | [10]      |
| 93                                                                               | $\text{Cl}^{\bullet} + \text{NOM} \rightarrow \text{products}$                                                  | $1.3 \times 10^4 \text{ M}^{-1} \text{ s}^{-1}$    | [10]      |
| <b>In the presence of <math>\text{HPO}_4^{2-}/\text{H}_2\text{PO}_4^-</math></b> |                                                                                                                 |                                                    |           |
| 94                                                                               | $\text{SO}_4^{\bullet-} + \text{H}_2\text{PO}_4^- \rightarrow \text{products}$                                  | $7.2 \times 10^4 \text{ M}^{-1} \text{ s}^{-1}$    | [10]      |
| 95                                                                               | $\text{SO}_4^{\bullet-} + \text{HPO}_4^{2-} \rightarrow \text{SO}_4^{2-} + \text{HPO}_4^{\bullet-}$             | $1.2 \times 10^6 \text{ M}^{-1} \text{ s}^{-1}$    | [10]      |
| 96                                                                               | $\text{}^{\bullet}\text{OH} + \text{H}_2\text{PO}_4^- \rightarrow \text{HPO}_4^{\bullet-} + \text{H}_2\text{O}$ | $1.5 \times 10^5 \text{ M}^{-1} \text{ s}^{-1}$    | [10]      |
| 97                                                                               | $\text{}^{\bullet}\text{OH} + \text{HPO}_4^{2-} \rightarrow \text{HPO}_4^{\bullet-} + \text{OH}^-$              | $2 \times 10^4 \text{ M}^{-1} \text{ s}^{-1}$      | [10]      |
| 98                                                                               | $\text{H}_2\text{PO}_4^- + \text{H}^+ \rightarrow \text{H}_3\text{PO}_4$                                        | $5.0 \times 10^{10} \text{ M}^{-1} \text{ s}^{-1}$ | [11]      |
| 99                                                                               | $\text{H}_3\text{PO}_4 \rightarrow \text{H}^+ + \text{H}_2\text{PO}_4^-$                                        | $3.97 \times 10^8 \text{ M}^{-1} \text{ s}^{-1}$   | [11]      |
| <b>In the presence of <math>\text{Br}^-</math></b>                               |                                                                                                                 |                                                    |           |



| No  | Reaction                                                                                              | Rate Constant                                       | Reference |
|-----|-------------------------------------------------------------------------------------------------------|-----------------------------------------------------|-----------|
| 100 | $\text{SO}_4^{\bullet-} + \text{Br}^- \rightarrow \text{SO}_4^{2-} + \text{Br}^\bullet$               | $3.5 \times 10^9 \text{ M}^{-1} \text{ s}^{-1}$     | [12]      |
| 101 | $\cdot\text{OH} + \text{Br}^- \rightarrow \text{BrOH}^{\bullet-}$                                     | $1.1 \times 10^{10} \text{ M}^{-1} \text{ s}^{-1}$  | [13]      |
| 102 | $\text{Br}^\bullet + \text{H}_2\text{O} \rightarrow \text{BrOH}^{\bullet-} + \text{H}^+$              | $1.4 \text{ M}^{-1} \text{ s}^{-1}$                 | [13]      |
| 103 | $\text{Br}^\bullet + \text{OH}^- \rightarrow \text{BrOH}^{\bullet-}$                                  | $1.06 \times 10^{10} \text{ M}^{-1} \text{ s}^{-1}$ | [14]      |
| 104 | $\text{BrOH}^{\bullet-} \rightarrow \cdot\text{OH} + \text{Br}^-$                                     | $3.3 \times 10^7 \text{ s}^{-1}$                    | [14]      |
| 105 | $\text{BrOH}^{\bullet-} \rightarrow \text{Br}^\bullet + \text{OH}^-$                                  | $4.2 \times 10^6 \text{ s}^{-1}$                    | [14]      |
| 106 | $\text{BrOH}^{\bullet-} + \text{H}^+ \rightarrow \text{Br}^\bullet + \text{H}_2\text{O}$              | $4.4 \times 10^{10} \text{ M}^{-1} \text{ s}^{-1}$  | [14]      |
| 107 | $\text{BrOH}^{\bullet-} + \text{Br}^- \rightarrow \text{Br}_2^{\bullet-} + \text{OH}^-$               | $1.9 \times 10^8 \text{ M}^{-1} \text{ s}^{-1}$     | [14]      |
| 108 | $\text{Br}^\bullet + \text{Br}^- \rightarrow \text{Br}_2^{\bullet-}$                                  | $1.2 \times 10^{10} \text{ M}^{-1} \text{ s}^{-1}$  | [15]      |
| 109 | $\text{Br}^\bullet + \text{Br}^\bullet \rightarrow \text{Br}_2$                                       | $1.0 \times 10^9 \text{ M}^{-1} \text{ s}^{-1}$     | [13]      |
| 110 | $\text{Br}^\bullet + \text{H}_2\text{O}_2 \rightarrow \text{HO}_2^\bullet + \text{Br}^- + \text{H}^+$ | $4.0 \times 10^9 \text{ M}^{-1} \text{ s}^{-1}$     | [16]      |
| 111 | $\text{Br}^\bullet + \text{HO}_2^\bullet \rightarrow \text{Br}^- + \text{H}^+ + \text{O}_2$           | $1.6 \times 10^8 \text{ M}^{-1} \text{ s}^{-1}$     | [16]      |

| No  | Reaction                                                                                                    | Rate Constant                                   | Reference |
|-----|-------------------------------------------------------------------------------------------------------------|-------------------------------------------------|-----------|
| 112 | $\text{Br}^\bullet + \text{BrO}^- \rightarrow \text{BrO}^\bullet + \text{Br}^-$                             | $4.0 \times 10^9 \text{ M}^{-1} \text{ s}^{-1}$ | [17]      |
| 113 | $\text{Br}_2^{\bullet-} \rightarrow \text{Br}^\bullet + \text{Br}^-$                                        | $1.9 \times 10^4 \text{ s}^{-1}$                | [15]      |
| 114 | $\text{Br}_2^{\bullet-} + \text{Br}_2^{\bullet-} \rightarrow \text{Br}_2 + 2\text{Br}^-$                    | $1.9 \times 10^9 \text{ M}^{-1} \text{ s}^{-1}$ | [18]      |
| 115 | $\text{Br}_2^{\bullet-} + \text{Br}^\bullet \rightarrow \text{Br}_2 + \text{Br}^-$                          | $2.0 \times 10^9 \text{ M}^{-1} \text{ s}^{-1}$ | [17]      |
| 116 | $\text{Br}_2^{\bullet-} + \text{H}_2\text{O}_2 \rightarrow \text{HO}_2^\bullet + 2\text{Br}^- + \text{H}^+$ | $5.0 \times 10^2 \text{ M}^{-1} \text{ s}^{-1}$ | [19]      |
| 117 | $\text{Br}_2^{\bullet-} + \text{HO}_2^\bullet \rightarrow \text{HBr} + \text{Br} + \text{O}_2$              | $1.0 \times 10^8 \text{ M}^{-1} \text{ s}^{-1}$ | [17]      |
| 118 | $\text{Br}_2^{\bullet-} + \text{HO}_2^\bullet \rightarrow \text{Br}_2 + \text{HO}_2^-$                      | $4.4 \times 10^9 \text{ M}^{-1} \text{ s}^{-1}$ | [18]      |
| 119 | $\text{Br}_2^{\bullet-} + \text{O}_2^{\bullet-} \rightarrow \text{Br}^- + \text{Br}^- + \text{O}_2$         | $1.7 \times 10^8 \text{ M}^{-1} \text{ s}^{-1}$ | [16]      |
| 120 | $\text{Br}_2^{\bullet-} + \text{BrO}^- \rightarrow \text{BrO}^\bullet + 2\text{Br}^-$                       | $6.2 \times 10^7 \text{ M}^{-1} \text{ s}^{-1}$ | [17]      |
| 121 | $\text{Br}_2^{\bullet-} + \text{HO}^\bullet \rightarrow \text{HOBr} + \text{Br}^-$                          | $1.0 \times 10^9 \text{ M}^{-1} \text{ s}^{-1}$ | [16]      |
| 122 | $\text{Br}_2^{\bullet-} + \text{OH}^- \rightarrow \text{BrOH}^{\bullet-} + \text{Br}^-$                     | $2.7 \times 10^6 \text{ M}^{-1} \text{ s}^{-1}$ | [19]      |
| 123 | $\text{Br}_2 + \text{Br}^- \rightarrow \text{Br}_3^-$                                                       | $9.6 \times 10^8 \text{ M}^{-1} \text{ s}^{-1}$ | [15]      |

| No  | Reaction                                                                                              | Rate Constant                                      | Reference |
|-----|-------------------------------------------------------------------------------------------------------|----------------------------------------------------|-----------|
| 124 | $\text{Br}_2 + \text{HO}_2^\bullet \rightarrow \text{Br}_2^{\bullet-} + \text{O}_2 + \text{H}^+$      | $1.1 \times 10^8 \text{ M}^{-1} \text{ s}^{-1}$    | [20]      |
| 125 | $\text{Br}_2 + \text{O}_2^{\bullet-} \rightarrow \text{Br}_2^{\bullet-} + \text{O}_2$                 | $5.6 \times 10^9 \text{ M}^{-1} \text{ s}^{-1}$    | [20]      |
| 126 | $\text{Br}_2 + \text{H}_2\text{O} \rightarrow \text{HOBr} + \text{Br}^- + \text{H}^+$                 | $97 \text{ M}^{-1} \text{ s}^{-1}$                 | [21]      |
| 127 | $\text{Br}_2 + \text{H}_2\text{O}_2 \rightarrow 2\text{HBr} + \text{O}_2$                             | $1.3 \times 10^3 \text{ M}^{-1} \text{ s}^{-1}$    | [16]      |
| 128 | $\text{Br}_3^- \rightarrow \text{Br}_2 + \text{Br}^-$                                                 | $5.5 \times 10^7 \text{ s}^{-1}$                   | [17]      |
| 129 | $\text{Br}_3^- + \text{HO}_2^\bullet \rightarrow \text{Br}_2^{\bullet-} + \text{HBr} + \text{O}_2$    | $1.0 \times 10^7 \text{ M}^{-1} \text{ s}^{-1}$    | [20]      |
| 130 | $\text{Br}_3^- + \text{O}_2^{\bullet-} \rightarrow \text{Br}_2^{\bullet-} + \text{Br}^- + \text{O}_2$ | $1.5 \times 10^9 \text{ M}^{-1} \text{ s}^{-1}$    | [20]      |
| 131 | $\text{HOBr} + \text{Br}^- + \text{H}^+ \rightarrow \text{Br}_2 + \text{H}_2\text{O}$                 | $1.6 \times 10^{10} \text{ M}^{-1} \text{ s}^{-1}$ | [22]      |
| 132 | $\text{HOBr} + \text{HO}_2^- \rightarrow \text{Br}^- + \text{H}_2\text{O} + \text{O}_2$               | $7.6 \times 10^8 \text{ M}^{-1} \text{ s}^{-1}$    | [17]      |
| 133 | $\text{HOBr} + \text{H}_2\text{O}_2 \rightarrow \text{HBr} + \text{H}_2\text{O} + \text{O}_2$         | $3.5 \times 10^4 \text{ M}^{-1} \text{ s}^{-1}$    | [23]      |
| 134 | $\text{HOBr} + \text{}^\bullet\text{OH} \rightarrow \text{BrO}^\bullet + \text{H}_2\text{O}$          | $2.0 \times 10^9 \text{ M}^{-1} \text{ s}^{-1}$    | [20]      |
| 135 | $\text{HOBr} + \text{O}_2^{\bullet-} \rightarrow \text{O}_2 + \text{OH}^- + \text{Br}^\bullet$        | $3.5 \times 10^9 \text{ M}^{-1} \text{ s}^{-1}$    | [24]      |

| No  | Reaction                                                                                                                    | Rate Constant                                   | Reference |
|-----|-----------------------------------------------------------------------------------------------------------------------------|-------------------------------------------------|-----------|
| 136 | $\text{HOBr} + \text{HO}_2^\bullet \rightarrow \text{BrOH}^{\bullet-} + \text{H}^+$                                         | $3.5 \times 10^9 \text{ M}^{-1} \text{ s}^{-1}$ | [18]      |
| 137 | $\text{BrO}^- + \text{H}_2\text{O}_2 \rightarrow \text{Br}^- + \text{H}_2\text{O} + \text{O}_2$                             | $1.2 \times 10^6 \text{ M}^{-1} \text{ s}^{-1}$ | [17]      |
| 138 | $\text{BrO}^- + \bullet\text{OH} \rightarrow \text{BrO}^\bullet + \text{OH}^-$                                              | $4.5 \times 10^9 \text{ M}^{-1} \text{ s}^{-1}$ | [17]      |
| 139 | $\text{BrO}^- + \text{O}_2^{\bullet-} + \text{H}_2\text{O} \rightarrow \text{Br}^\bullet + 2\text{OH}^- + \text{O}_2$       | $2.0 \times 10^8 \text{ M}^{-1} \text{ s}^{-1}$ | [24]      |
| 140 | $\text{HOBr} + \text{SO}_4^{\bullet-} \rightarrow \text{BrO}^\bullet + \text{SO}_4^{2-} + \text{H}^+$                       | $2.0 \times 10^9 \text{ M}^{-1} \text{ s}^{-1}$ | [23]      |
| 141 | $\text{BrO}^- + \text{SO}_4^{\bullet-} \rightarrow \text{BrO}^\bullet + \text{SO}_4^{2-}$                                   | $4.5 \times 10^9 \text{ M}^{-1} \text{ s}^{-1}$ | [23]      |
| 142 | $\text{BrO}^\bullet + \text{BrO}^\bullet + \text{H}_2\text{O} \rightarrow$<br>$\text{BrO}^- + \text{BrO}_2^- + 2\text{H}^+$ | $5.0 \times 10^9 \text{ M}^{-1} \text{ s}^{-1}$ | [17]      |
| 143 | $\text{BrO}^\bullet + \text{BrO}_2^- \rightarrow \text{BrO}^- + \text{BrO}_2^\bullet$                                       | $3.4 \times 10^8 \text{ M}^{-1} \text{ s}^{-1}$ | [17]      |
| 144 | $\text{Br}_2^{\bullet-} + \text{BrO}_2^- \rightarrow \text{BrO}^- + \text{BrO}^\bullet + \text{Br}^-$                       | $8.0 \times 10^7 \text{ M}^{-1} \text{ s}^{-1}$ | [17]      |
| 145 | $\bullet\text{OH} + \text{BrO}_2^- \rightarrow \text{BrO}_2^\bullet + \text{OH}^-$                                          | $1.9 \times 10^9 \text{ M}^{-1} \text{ s}^{-1}$ | [17]      |
| 146 | $\bullet\text{OH} + \text{BrO}_2^\bullet \rightarrow \text{BrO}_3^- + \text{H}^+$                                           | $2.0 \times 10^9 \text{ M}^{-1} \text{ s}^{-1}$ | [17]      |

| No  | Reaction                                                                                                                     | Rate Constant                                   | Reference |
|-----|------------------------------------------------------------------------------------------------------------------------------|-------------------------------------------------|-----------|
| 147 | $\text{BrO}_2^\bullet + \text{BrO}_2^\bullet \rightarrow \text{Br}_2\text{O}_4$                                              | $1.4 \times 10^9 \text{ M}^{-1} \text{ s}^{-1}$ | [17]      |
| 148 | $\text{Br}_2\text{O}_4 \rightarrow \text{BrO}_2^\bullet + \text{BrO}_2^\bullet$                                              | $7.0 \times 10^7 \text{ s}^{-1}$                | [17]      |
| 149 | $\text{Br}_2\text{O}_4 + \text{OH}^- \rightarrow \text{BrO}_3^- + \text{BrO}_2^- + \text{H}^+$                               | $7.0 \times 10^8 \text{ M}^{-1} \text{ s}^{-1}$ | [17]      |
| 150 | $\text{BrO}_2^\bullet + \text{BrO}_2^\bullet + \text{H}_2\text{O} \rightarrow \text{BrO}_3^- + \text{BrO}_2^- + 2\text{H}^+$ | $4.2 \times 10^7 \text{ M}^{-1} \text{ s}^{-1}$ | [25]      |

**Table S2. Modeled steady-state concentrations of  $\cdot\text{OH}$  and  $\text{SO}_4^{\cdot-}$  in different water matrices.**

| Radical species<br>(M) |                                                 | Control <sup>a</sup> | Cl <sup>-</sup> (mM) |       |       | HCO <sub>3</sub> <sup>-</sup> (mM) |      |      |
|------------------------|-------------------------------------------------|----------------------|----------------------|-------|-------|------------------------------------|------|------|
|                        |                                                 |                      | 0.5                  | 1     | 3     | 0.5                                | 1    | 3    |
| ACY                    | $\cdot\text{OH}$<br>( $\times 10^{-14}$ )       | 8.80                 | 18.57                | 33.24 | 39.11 | 8.05                               | 7.48 | 5.69 |
|                        | $\text{SO}_4^{\cdot-}$<br>( $\times 10^{-13}$ ) | 7.56                 | 4.52                 | 3.24  | 1.52  | 7.08                               | 7.46 | 5.71 |
| ATL                    | $\cdot\text{OH}$<br>( $\times 10^{-14}$ )       | 6.62                 | 18.15                | 22.98 | 10.90 | 6.67                               | 6.60 | 6.48 |
|                        | $\text{SO}_4^{\cdot-}$<br>( $\times 10^{-13}$ ) | 5.70                 | 4.39                 | 1.49  | 1.38  | 4.33                               | 4.11 | 3.77 |

<sup>a</sup> Conditions: [ACY]<sub>0</sub> = 0.022 mM, [ATL]<sub>0</sub> = 0.019 mM, PDS = 0.6 mM, UV<sub>254</sub>, pH = 6.0, T = 20°C.

**Table S3.** Calculated condensed Fukui function and dual descriptor of ACY.<sup>a</sup>

| Atom  | q(N)    | q(N+1)  | q(N-1)  | f <sup>-</sup> | f <sup>+</sup> | f <sup>0</sup> | CDD     |
|-------|---------|---------|---------|----------------|----------------|----------------|---------|
| 1(C)  | 0.0627  | 0.0029  | 0.1251  | 0.0624         | 0.0597         | 0.0611         | -0.0027 |
| 2(C)  | -0.0286 | -0.0838 | 0.0628  | 0.0914         | 0.0552         | 0.0733         | -0.0362 |
| 3(C)  | 0.1549  | 0.1206  | 0.1953  | 0.0404         | 0.0343         | 0.0373         | -0.0062 |
| 4(N)  | -0.0773 | -0.1292 | -0.0517 | 0.0257         | 0.0519         | 0.0388         | 0.0262  |
| 5(C)  | 0.1586  | 0.0481  | 0.2092  | 0.0506         | 0.1105         | 0.0806         | 0.0599  |
| 6(N)  | -0.2273 | -0.2777 | -0.1399 | 0.0873         | 0.0504         | 0.0689         | -0.0369 |
| 7(N)  | -0.0167 | -0.0585 | 0.0112  | 0.0279         | 0.0417         | 0.0348         | 0.0138  |
| 8(C)  | 0.0495  | -0.0132 | 0.1563  | 0.1068         | 0.0628         | 0.0848         | -0.0440 |
| 9(N)  | -0.1926 | -0.2383 | -0.1218 | 0.0708         | 0.0457         | 0.0583         | -0.0251 |
| 10(C) | 0.0907  | 0.0752  | 0.0984  | 0.0077         | 0.0155         | 0.0116         | 0.0077  |
| 11(O) | -0.1582 | -0.1643 | -0.1543 | 0.0039         | 0.0061         | 0.0050         | 0.0021  |
| 12(C) | 0.0324  | 0.0229  | 0.0379  | 0.0055         | 0.0095         | 0.0075         | 0.0040  |
| 13(C) | 0.0254  | 0.0149  | 0.0293  | 0.0039         | 0.0105         | 0.0072         | 0.0066  |
| 14(O) | -0.2398 | -0.2601 | -0.2273 | 0.0124         | 0.0203         | 0.0164         | 0.0079  |
| 15(O) | -0.3038 | -0.3782 | -0.1739 | 0.1299         | 0.0744         | 0.1021         | -0.0556 |
| 16(N) | -0.1678 | -0.2328 | -0.0953 | 0.0725         | 0.0650         | 0.0688         | -0.0074 |
| 17(H) | 0.1417  | 0.1057  | 0.1698  | 0.0281         | 0.0360         | 0.0320         | 0.0079  |
| 18(H) | 0.0605  | 0.0257  | 0.1048  | 0.0443         | 0.0348         | 0.0395         | -0.0095 |
| 19(H) | 0.0374  | 0.0113  | 0.0538  | 0.0164         | 0.0261         | 0.0213         | 0.0097  |
| 20(H) | 0.0375  | 0.0205  | 0.0505  | 0.0131         | 0.0169         | 0.0150         | 0.0038  |
| 21(H) | 0.0341  | 0.0232  | 0.0425  | 0.0084         | 0.0108         | 0.0096         | 0.0024  |
| 22(H) | 0.0341  | 0.0246  | 0.0424  | 0.0082         | 0.0096         | 0.0089         | 0.0014  |
| 23(H) | 0.0304  | 0.0215  | 0.0340  | 0.0036         | 0.0089         | 0.0063         | 0.0052  |
| 24(H) | 0.0299  | 0.0221  | 0.0333  | 0.0033         | 0.0078         | 0.0056         | 0.0045  |
| 25(H) | 0.1727  | 0.1356  | 0.1830  | 0.0103         | 0.0371         | 0.0237         | 0.0269  |
| 26(H) | 0.1316  | 0.0935  | 0.1615  | 0.0299         | 0.0381         | 0.0340         | 0.0082  |
| 27(H) | 0.0678  | 0.1630  | 0.0350  | 0.0603         | 0.0476         | 0.0253         | 0.021   |

<sup>a</sup> Units used above are “e” (elementary charge).

**Table S4.** Calculated condensed Fukui function and dual descriptor of ATL.<sup>a</sup>

| Atom  | q(N)    | q(N+1)  | q(N-1)  | <i>f</i> <sup>-</sup> | <i>f</i> <sup>+</sup> | <i>f</i> <sup>0</sup> | CDD     |
|-------|---------|---------|---------|-----------------------|-----------------------|-----------------------|---------|
| 1(O)  | -0.3236 | -0.3728 | -0.2092 | 0.1144                | 0.0492                | 0.0818                | -0.0652 |
| 2(C)  | 0.1648  | 0.1477  | 0.1971  | 0.0323                | 0.0171                | 0.0247                | -0.0152 |
| 3(N)  | -0.1540 | -0.1679 | -0.1237 | 0.0303                | 0.0140                | 0.0221                | -0.0163 |
| 4(C)  | -0.0516 | -0.0643 | -0.0304 | 0.0212                | 0.0127                | 0.0169                | -0.0085 |
| 5(C)  | -0.0166 | -0.0515 | 0.0407  | 0.0573                | 0.0349                | 0.0461                | -0.0224 |
| 6(C)  | -0.0429 | -0.1298 | -0.0102 | 0.0326                | 0.0870                | 0.0598                | 0.0543  |
| 7(C)  | -0.0566 | -0.1662 | -0.0069 | 0.0497                | 0.1095                | 0.0796                | 0.0598  |
| 8(C)  | 0.0760  | 0.0371  | 0.1268  | 0.0508                | 0.0389                | 0.0449                | -0.0119 |
| 9(O)  | -0.1262 | -0.1458 | -0.0543 | 0.0719                | 0.0196                | 0.0457                | -0.0523 |
| 10(C) | 0.0315  | 0.0233  | 0.0429  | 0.0114                | 0.0082                | 0.0098                | -0.0032 |
| 11(C) | 0.0443  | 0.0403  | 0.0478  | 0.0035                | 0.0040                | 0.0038                | 0.0005  |
| 12(O) | -0.2520 | -0.2572 | -0.2405 | 0.0115                | 0.0052                | 0.0083                | -0.0063 |
| 13(C) | -0.0131 | -0.0181 | -0.0037 | 0.0094                | 0.0050                | 0.0072                | -0.0045 |
| 14(N) | -0.1293 | -0.1357 | -0.0760 | 0.0533                | 0.0064                | 0.0299                | -0.0469 |
| 15(C) | 0.0288  | 0.0250  | 0.0359  | 0.0071                | 0.0038                | 0.0055                | -0.0033 |
| 16(C) | -0.0943 | -0.1017 | -0.0831 | 0.0112                | 0.0075                | 0.0093                | -0.0037 |
| 17(C) | -0.0888 | -0.0967 | -0.0824 | 0.0065                | 0.0079                | 0.0072                | 0.0014  |
| 18(C) | -0.0712 | -0.1571 | -0.0271 | 0.0441                | 0.0859                | 0.0650                | 0.0418  |
| 19(C) | -0.0453 | -0.1485 | -0.0049 | 0.0405                | 0.1032                | 0.0718                | 0.0627  |
| 20(H) | 0.1177  | 0.1176  | 0.1285  | 0.0108                | 0.0001                | 0.0055                | -0.0107 |
| 21(H) | 0.1337  | 0.1128  | 0.1573  | 0.0236                | 0.0208                | 0.0222                | -0.0028 |
| 22(H) | 0.0473  | 0.0253  | 0.0708  | 0.0235                | 0.0220                | 0.0227                | -0.0015 |
| 23(H) | 0.0475  | 0.0232  | 0.0701  | 0.0226                | 0.0244                | 0.0235                | 0.0018  |
| 24(H) | 0.0447  | -0.0003 | 0.0691  | 0.0244                | 0.0450                | 0.0347                | 0.0206  |
| 25(H) | 0.0491  | -0.0019 | 0.0773  | 0.0281                | 0.0510                | 0.0396                | 0.0229  |
| 26(H) | 0.0364  | 0.0261  | 0.0535  | 0.0171                | 0.0103                | 0.0137                | -0.0068 |
| 27(H) | 0.0303  | 0.0188  | 0.0469  | 0.0167                | 0.0115                | 0.0141                | -0.0052 |
| 28(H) | 0.0224  | 0.0150  | 0.0309  | 0.0086                | 0.0073                | 0.0080                | -0.0013 |
| 29(H) | 0.1284  | 0.1168  | 0.1403  | 0.0119                | 0.0115                | 0.0117                | -0.0004 |
| 30(H) | 0.0345  | 0.0297  | 0.0436  | 0.0091                | 0.0047                | 0.0069                | -0.0044 |
| 31(H) | 0.0225  | 0.0156  | 0.0386  | 0.0162                | 0.0069                | 0.0115                | -0.0092 |
| 32(H) | 0.1039  | 0.0888  | 0.1217  | 0.0178                | 0.0151                | 0.0165                | -0.0027 |
| 33(H) | 0.0320  | 0.0272  | 0.0401  | 0.0081                | 0.0048                | 0.0064                | -0.0033 |
| 34(H) | 0.0338  | 0.0195  | 0.0495  | 0.0157                | 0.0143                | 0.0150                | -0.0013 |
| 35(H) | 0.0292  | 0.0259  | 0.0328  | 0.0036                | 0.0033                | 0.0035                | -0.0003 |
| 36(H) | 0.0278  | 0.0193  | 0.0359  | 0.0081                | 0.0085                | 0.0083                | 0.0004  |
| 37(H) | 0.0345  | 0.0217  | 0.0471  | 0.0125                | 0.0128                | 0.0127                | 0.0003  |
| 38(H) | 0.0334  | 0.0269  | 0.0389  | 0.0055                | 0.0065                | 0.0060                | 0.0010  |
| 39(H) | 0.0293  | 0.0208  | 0.0363  | 0.0070                | 0.0086                | 0.0078                | 0.0016  |
| 40(H) | 0.0391  | -0.0024 | 0.0635  | 0.0245                | 0.0415                | 0.0330                | 0.0171  |
| 41(H) | 0.0426  | -0.0066 | 0.0684  | 0.0257                | 0.0492                | 0.0375                | 0.0235  |



**Table S5.** Major intermediates of ACY detected in UV/PDS process.

| TPs | Retention<br>time(min) | Chemical<br>Formula                                          | Exact Mass | Identified method |
|-----|------------------------|--------------------------------------------------------------|------------|-------------------|
| ACY | 1.645                  | C <sub>8</sub> H <sub>11</sub> N <sub>5</sub> O <sub>3</sub> | 225.0      | UPLC-Q-TOF-MS     |
| TP1 | 4.554                  | C <sub>8</sub> H <sub>13</sub> N <sub>5</sub> O <sub>4</sub> | 243.0      | UPLC-Q-TOF-MS     |
| TP2 | 4.754                  | C <sub>8</sub> H <sub>13</sub> N <sub>5</sub> O <sub>5</sub> | 259.0      | UPLC-Q-TOF-MS     |
| TP3 | 1.296                  | C <sub>7</sub> H <sub>11</sub> N <sub>5</sub> O <sub>4</sub> | 213.0      | UPLC-Q-TOF-MS     |
| TP4 | 5.019                  | C <sub>7</sub> H <sub>11</sub> N <sub>3</sub> O <sub>4</sub> | 201.0      | UPLC-Q-TOF-MS     |
| TP5 | 5.684                  | C <sub>7</sub> H <sub>14</sub> N <sub>3</sub> O <sub>4</sub> | 203.0      | UPLC-Q-TOF-MS     |
| TP6 | 1.345                  | C <sub>5</sub> H <sub>7</sub> N <sub>3</sub> O <sub>3</sub>  | 157.0      | UPLC-Q-TOF-MS     |

**Table S6.** Major intermediates of ATL detected in UV/PDS process.

| TPs  | Retention<br>time(min) | Chemical<br>Formula                                           | Exact Mass | Identified method |
|------|------------------------|---------------------------------------------------------------|------------|-------------------|
| ATL  | 4.004                  | C <sub>14</sub> H <sub>22</sub> N <sub>2</sub> O <sub>3</sub> | 266.2      | UPLC-Q-TOF-MS     |
| TP1  | 13.050                 | C <sub>14</sub> H <sub>21</sub> NO <sub>4</sub>               | 267.1      | UPLC-Q-TOF-MS     |
| TP2  | 1.677                  | C <sub>13</sub> H <sub>19</sub> NO <sub>3</sub>               | 237.1      | UPLC-Q-TOF-MS     |
| TP3  | 4.852                  | C <sub>13</sub> H <sub>19</sub> NO <sub>4</sub>               | 253.1      | UPLC-Q-TOF-MS     |
| TP4  | 1.245                  | C <sub>6</sub> H <sub>15</sub> NO <sub>2</sub>                | 133.1      | UPLC-Q-TOF-MS     |
| TP5  | 4.104                  | C <sub>11</sub> H <sub>16</sub> N <sub>2</sub> O <sub>3</sub> | 224.1      | UPLC-Q-TOF-MS     |
| TP6  | 3.406                  | C <sub>8</sub> H <sub>9</sub> NO <sub>2</sub>                 | 151.0      | UPLC-Q-TOF-MS     |
| TP7  | 5.765                  | C <sub>16</sub> H <sub>16</sub> N <sub>2</sub> O <sub>6</sub> | 332.0      | UPLC-Q-TOF-MS     |
| TP8  | 1.677                  | C <sub>14</sub> H <sub>22</sub> N <sub>2</sub> O <sub>4</sub> | 282.1      | UPLC-Q-TOF-MS     |
| TP9  | 4.071                  | C <sub>14</sub> H <sub>20</sub> N <sub>2</sub> O <sub>4</sub> | 280.1      | UPLC-Q-TOF-MS     |
| TP10 | 1.689                  | C <sub>14</sub> H <sub>22</sub> N <sub>2</sub> O <sub>5</sub> | 298.1      | UPLC-Q-TOF-MS     |

## References

- [1] M.K. Li, Z.M. Qiang, J.R. Bolton, J.H. Qu, W.T. Li, A mini-fluidic UV photoreaction system for bench-scale photochemical studies, *Environ. Sci. Technol. Lett.* 2015, 2, 297-301.
- [2] M.L. Scholes, M.N. Schuchmann, C.V. Sonntag, Enhancement of radiation-induced base release from nucleosides in alkaline solution: essential role of the  $O^{\cdot-}$  radical, *Int. J. Radiat. Biol.* 1992, 61, 443-449.
- [3] N. Neghi, N.R. Krishnan, M. Kumar, Analysis of metronidazole removal and micro-toxicity in photolytic systems: Effects of persulfate dosage, anions and reactor operation-mode, *J. Environ. Chem. Eng.* 2018, 6, 754-761.
- [4] M.K. Li, C. Wang, M.L. Yau, J.R. Bolton, Z.M. Qiang, Sulfamethazine degradation in water by the VUV/UV process: Kinetics, mechanism and antibacterial activity determination based on a mini-fluidic VUV/UV photoreaction system, *Water Res.* 2017, 108, 348-355.
- [5] Y. Yang, J.J. Pignatello, J. Ma, W.A. Mitch, Effect of matrix components on UV/H<sub>2</sub>O<sub>2</sub> and UV/S<sub>2</sub>O<sub>8</sub><sup>2-</sup> advanced oxidation processes for trace organic degradation in reverse osmosis brines from municipal wastewater reuse facilities, *Water Res.* 2016, 89, 192-200.
- [6] J.E. Grebel, J.J. Pignatello, W.A. Mitch, Effect of halide ions and carbonates on organic contaminant degradation by hydroxyl radical-based advanced oxidation processes in saline waters, *Environ. Sci. Technol.* 2010, 44, 6822-6828.
- [7] C.J. Liang, Z.S. Wang, N. Mohanty, Influences of carbonate and chloride ions on persulfate oxidation of trichloroethylene at 20°C, *Sci. Total. Environ.* 2006, 370, 271-277.

- [8] Y.H. Guan, J. Ma, X.C. Li, J.Y. Fang, L.W. Chen, Influence of pH on the formation of sulfate and hydroxyl radicals in the UV/peroxymonosulfate system, *Environ. Sci. Technol.* 2011, 45, 9308-9314.
- [9] X.Y. Yu, Z.C. B, J.R. Barker, Free radical reactions involving  $\text{Cl}^\bullet$ ,  $\text{Cl}_2^{\bullet-}$ , and  $\text{SO}_4^{\bullet-}$  in the 248 nm Photolysis of Aqueous Solutions Containing  $\text{S}_2\text{O}_8^{2-}$  and  $\text{Cl}^-$ , *J. Phys. Chem.* 2004, 108, 295-308.
- [10] S.D. Hou, L. Ling, C. Shang, Y.H. Guan, J.Y. Fang, Degradation kinetics and pathways of haloacetonitriles by the UV/persulfate process, *Chem. Eng. J.* 2017, 320, 478-484.
- [11] Y. Yang, J.J. Pignatello, J. Ma, W.A. Mitch, Comparison of halide impacts on the efficiency of contaminant degradation by sulfate and hydroxyl radical-based advanced oxidation processes (AOPs), *Environ. Sci. Technol.* 2014, 48, 2344-2351.
- [12] G.R. Peyton, The free-radical chemistry of persulfate-based total organic carbon analyzers, *Mar. Chem.* 1993, 41, 91-103.
- [13] U.K. Klaning, Laser flash photolysis of  $\text{HClO}$ ,  $\text{ClO}^-$ ,  $\text{HBrO}$ , and  $\text{BrO}^-$  in aqueous solution. Reactions of  $\text{Cl}^-$  and  $\text{Br}^-$  atoms, *Ber. Bunsenges. Phys. Chem.* 1985, 89, 243-245.
- [14] D. Zehavi, J. Rabani, Oxidation of aqueous bromide ions by hydroxyl radicals. Pulse radiolytic investigation, *J. Phys. Chem.* 1972, 3, 76.
- [15] M.Z. Lin, P. Archirel, N.T. Van-Oanh, Y. Muroya, H. Fu, Y. Yan, R. Nagaishi, Y. Kumagai, Y. Katsumura, M. Mostafavi, Temperature dependent absorption spectra of  $\text{Br}^-$ ,  $\text{Br}_2^{\bullet-}$ , and  $\text{Br}_3^-$  in aqueous solutions, *J. Phys. Chem. A.* 2011, 115, 4241-4247.

- [16] I.Wagner, H. Strehlow, On the flash-photolysis of bromide ions in aqueous-solutions, *Ber. Bunsenges. Phys. Chem.* 1987, 91, 1317-1321.
- [17] U.V. Gunten, Y. Oliveras, Advanced oxidation of bromide-containing waters: Bromate formation mechanisms, *Environ. Sci. Technol.* 1998, 32, 63-70.
- [18] B.M.Matthew, C. Anastasio, A chemical probe technique for the determination of reactive halogen species in aqueous solution Part 1-bromide solutions, *Atmos. Chem. Phys.* 2006, 6, 2423–2437.
- [19] P.Neta, V. Madhavan, H.Zemel, R.W. Fessenden, Rate constants and mechanisms of reaction of  $\text{SO}_4^{\cdot-}$ , with aromatic compounds, *J. Am. Chem. Soc.* 1977, 99, 163-164.
- [20] H.C. Sutton, M.T. Downes, Reactions of the  $\text{HO}_2$  radical in aqueous solution with bromine and related compounds, *J. Chem. Soc, Faraday Trans 1: Physical Chemistry in Condensed Phases* 1972, 68, 1498-1507.
- [21] M.B. Heeb, J. Criquet, S.G. Zimmermann-Steffens, U.V. Gunten, Oxidative treatment of bromide-containing waters: formation of bromine and its reactions with inorganic and organic compounds -A critical review, *Water Res.* 2014, 48, 15-42.
- [22] R.C. Beckwith, T.X. Wang, D.W. Margerum, Equilibrium and kinetics of bromine hydrolysis, *Inorg. Chem.* 1996, 35, 995-1000.
- [23] Y.Z. Liu, Y. Yang, S.Y. Pang, L.Q. Zhang, J. Ma, C.W. Luo, C.T. Guan, J. Jiang, Mechanistic insight into suppression of bromate formation by dissolved organic matters in sulfate radical-based advanced oxidation processes, *Chem. Eng. J.* 2018, 333, 200-205.

- [24] H.A. Schwarz, B.H.J. Bielski, Reactions of hydroperoxo and superoxide with iodine and bromine and the iodide ( $I_2^-$ ) and iodine atom reduction potentials, J. Phys. Chem. 1986, 90, 1445-1448.
- [25] G.V. Buxton, F.S. Dainton, The radiolysis of aqueous solutions of oxybromine compounds; the spectra and reactions of BrO and BrO<sub>2</sub>, Math. Phys. Sci. 1968, 304, 427-439.
